# Supplementary material for: Cost-Effective Next Generation Sequencing-Based STR Typing with Improved Analysis of Minor, Degraded and Inhibitor-Containing DNA Samples
Source: MDPI journal article supplement (doi:10.3390/ijms24043382), 2023-02-08
Supplement: s1 [file s1]

## Supplementary data

|                                                                                                                                                                  |    |
|------------------------------------------------------------------------------------------------------------------------------------------------------------------|----|
| Supplementary Table S1. STR profile of DNA A5 and DNA B5 of the Human Random Control DNA Panel, and of HeLa DNA, as determined by capillary electrophoresis..... | 3  |
| Suppl. Figures S1-S6: Sensitivity study .....                                                                                                                    | 4  |
| Suppl. Figure S1. Sensitivity study: Sample 1 ng, human DNA A5 .....                                                                                             | 4  |
| Suppl. Figure S2. Sensitivity study: Sample 500 pg, human DNA A5 .....                                                                                           | 4  |
| Suppl. Figure S3. Sensitivity study: Sample 250 pg, human DNA A5 .....                                                                                           | 5  |
| Suppl. Figure S4. Sensitivity study: Sample 125 pg, human DNA A5 .....                                                                                           | 5  |
| Suppl. Figure S5. Sensitivity study: Sample 62.5 pg, human DNA A5 .....                                                                                          | 6  |
| Suppl. Figure S6. Sensitivity study: Sample 31.25 pg, human DNA A5 .....                                                                                         | 6  |
| Suppl. Figures S7-S11: Degradation study .....                                                                                                                   | 7  |
| Suppl. Figure S7. Degradation study: Sample 0 mU/μL DNaseI, HeLa DNA .....                                                                                       | 7  |
| Suppl. Figure S8. Degradation study: Sample 0.3 mU/μL DNaseI, HeLa DNA .....                                                                                     | 7  |
| Suppl. Figure S9. Degradation study: Sample 0.6 mU/μL DNaseI, HeLa DNA .....                                                                                     | 8  |
| Suppl. Figure S10. Degradation study: Sample 1.19 mU/μL DNaseI, HeLa DNA .....                                                                                   | 8  |
| Suppl. Figure S11. Degradation study: Sample 2.38 mU/μL DNaseI, HeLa DNA .....                                                                                   | 9  |
| Suppl. Figures S12-S17: Mixture study .....                                                                                                                      | 9  |
| Suppl. Figure S12. Mixtures study: Sample 500 pg DNA, human DNA B5 .....                                                                                         | 9  |
| Suppl. Figure S13. Mixtures study: Sample 50:50 mixture, human DNA A5 and B5 .....                                                                               | 10 |
| Suppl. Figure S14. Mixtures study: Sample 75:25 mixture, human DNA A5 and B5 .....                                                                               | 10 |
| Suppl. Figure S15. Mixtures study: Sample 90:10 mixture, human DNA A5 and B5 .....                                                                               | 11 |
| Suppl. Figure S16. Mixtures study: Sample 95:5 mixture, human DNA A5 and B5 .....                                                                                | 11 |
| Suppl. Figure S17. Mixtures study: Sample 98:2 mixture, human DNA A5 and B5 .....                                                                                | 12 |
| Suppl. Figures S18-S35: Inhibitor study .....                                                                                                                    | 12 |
| Suppl. Figure S18. Inhibitor study, 30 μM hematin, human DNA A5 .....                                                                                            | 12 |
| Suppl. Figure S19. Inhibitor study, 60 μM hematin, human DNA A5 .....                                                                                            | 13 |
| Suppl. Figure S20. Inhibitor study, 120 μM hematin, human DNA A5 .....                                                                                           | 13 |
| Suppl. Figure S21. Inhibitor study, 120 μM hematin with PowerPlex MM, human DNA A5 .....                                                                         | 14 |
| Suppl. Figure S22. Inhibitor study, 120 μM hematin with BSA, human DNA A5 .....                                                                                  | 14 |
| Suppl. Figure S23. Inhibitor study, 50 μM humic acid, human DNA A5 .....                                                                                         | 15 |
| Suppl. Figure S24. Inhibitor study, 100 μM humic acid, human DNA A5 .....                                                                                        | 15 |
| Suppl. Figure S25. Inhibitor study, 200 μM humic acid, human DNA A5 .....                                                                                        | 16 |
| Suppl. Figure S26. Inhibitor study, 200 μM humic acid with PowerPlex MM, human DNA A5 .....                                                                      | 16 |
| Suppl. Figure S27. Inhibitor study, 200 μM humic acid with BSA, human DNA A5 .....                                                                               | 17 |

|                                                                                                                                                         |    |
|---------------------------------------------------------------------------------------------------------------------------------------------------------|----|
| Suppl. Figure S28. Inhibitor study, 25µM melanin, human DNA A5 .....                                                                                    | 17 |
| Suppl. Figure S29. Inhibitor study, 50 µM melanin, human DNA A5 .....                                                                                   | 18 |
| Suppl. Figure S30. Inhibitor study, Sample 100 µM melanin, human DNA A5 .....                                                                           | 18 |
| Suppl. Figure S31. Inhibitor study, 100 µM melanin with PowerPlex MM, human DNA A5 .....                                                                | 19 |
| Suppl. Figure S32. Inhibitor study, Sample 100 µM melanin with BSA, human DNA A5 .....                                                                  | 19 |
| Suppl. Figure S33. Inhibitor study, 200 µM indigo, human DNA A5 .....                                                                                   | 20 |
| Suppl. Figure S34. Inhibitor study, 400 µM indigo, human DNA A5 .....                                                                                   | 20 |
| Suppl. Figure S35. Inhibitor study, 800 µM indigo, human DNA A5 .....                                                                                   | 21 |
| Suppl. Figures S36-S38: Electropherograms of DNA A5, B5, and HeLa DNA .....                                                                             | 22 |
| Suppl. Figure S36. Electropherogram of DNA A5 (500 pg, analysed with PowerPlex ESX17) .....                                                             | 22 |
| Suppl. Figure S37. Electropherogram of DNA B5 (500 pg, analysed with PowerPlex ESX17) .....                                                             | 23 |
| Suppl. Figure S38. Electropherogram of HeLa DNA (500 pg, analysed with PowerPlex ESX17) .....                                                           | 24 |
| Suppl. Figure S39: Intra- and inter-locus balances of profiles obtained with maSTR assay or CE analysis of PCR inhibitor-supplemented DNA samples ..... | 25 |
| Suppl. Figure S40: Intra-locus balance of HeLa DNA obtained with maSTR assay or CE analysis .....                                                       | 26 |
| Supplementary Table S2. Calculation of sequencing costs .....                                                                                           | 27 |

**Supplementary Table S1. STR profile of DNA A5 and DNA B5 of the Human Random Control DNA Panel, and of HeLa DNA, as determined by capillary electrophoresis (see Figures S36-S38).**

| <b>Locus</b>    | <b>A5</b>  | <b>B5*</b>         | <b>HeLa</b> |
|-----------------|------------|--------------------|-------------|
| <i>D10S1248</i> | 14, 15     | <u>14</u> , 16     | 13, 15      |
| <i>D12S391</i>  | 20, 23     | 19, 22             | 20, 25      |
| <i>D16S539</i>  | 12         | 11                 | 9, 10       |
| <i>D18S51</i>   | 15, 17     | 14, 16             | 16          |
| <i>D19S433</i>  | 13, 14     | <u>13</u> , 14.2   | 13, 14      |
| <i>D1S1656</i>  | 13, 15.3   | <u>15.3</u> , 17.3 | 12, 15      |
| <i>D21S11</i>   | 29         | 30, 32.2           | 27, 28      |
| <i>D22S1045</i> | 15, 16     | 14, <u>15</u>      | 16, 17      |
| <i>D2S1338</i>  | 20         | 17, <u>20</u>      | 17          |
| <i>D2S441</i>   | 14, 16     | 11, <u>14</u>      | 10, 11      |
| <i>D3S1358</i>  | 16, 18     | 15, 17             | 15, 18      |
| <i>D8S1179</i>  | 10         | 9, 14              | 12, 13      |
| <i>FGA</i>      | 20, 22     | 23, 25             | 18, 21      |
| <i>SE33</i>     | 29.2, 30.2 | 28.2, <u>30.2</u>  | 20          |
| <i>TH01</i>     | 9.3        | 6                  | 7           |
| <i>vWA</i>      | 17, 18     | <u>18</u>          | 16, 18      |

\*underlined: alleles shared with DNA A5

## Suppl. Figures S1-S6: Sensitivity study

Suppl. Figure S1. Sensitivity study: Sample 1 ng, human DNA A5

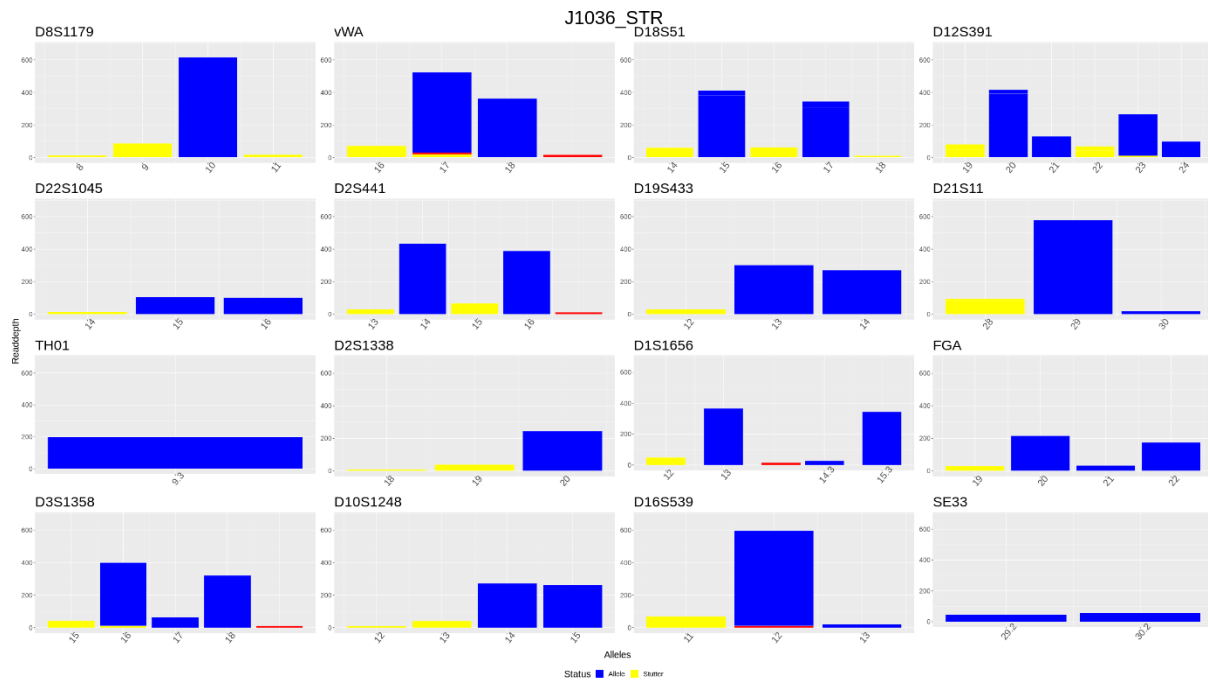

Suppl. Figure S2. Sensitivity study: Sample 500 pg, human DNA A5

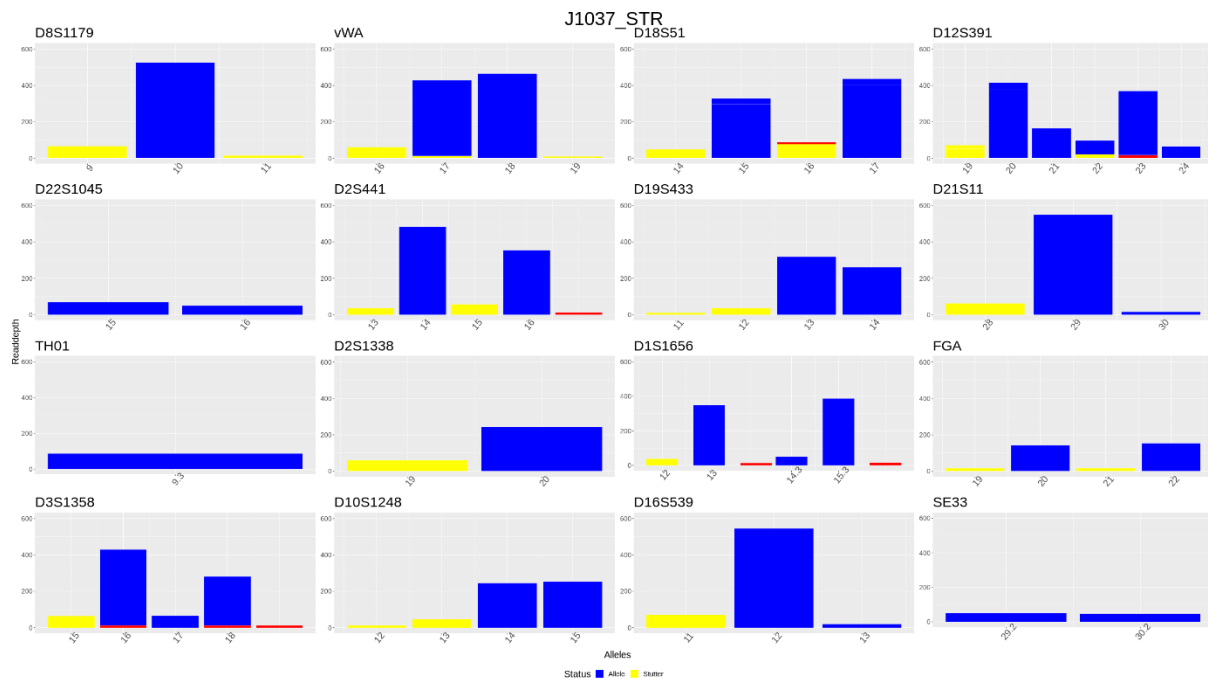

**Suppl. Figure S3. Sensitivity study: Sample 250 pg, human DNA A5**

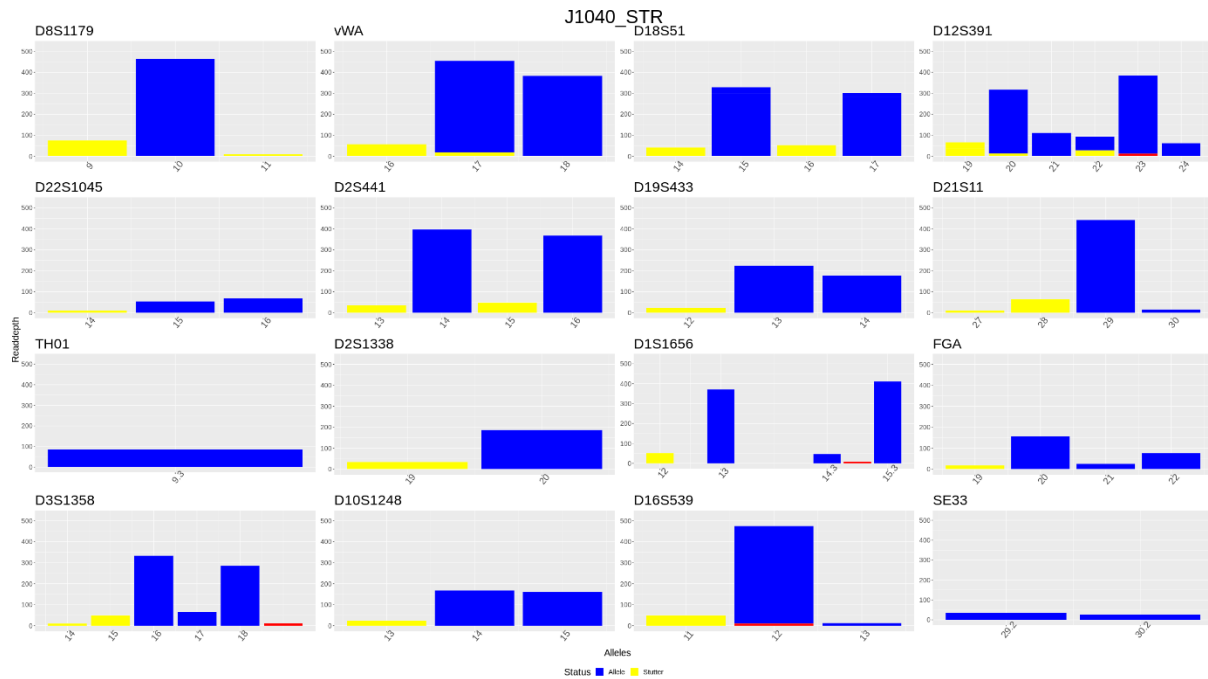

**Suppl. Figure S4. Sensitivity study: Sample 125 pg, human DNA A5**

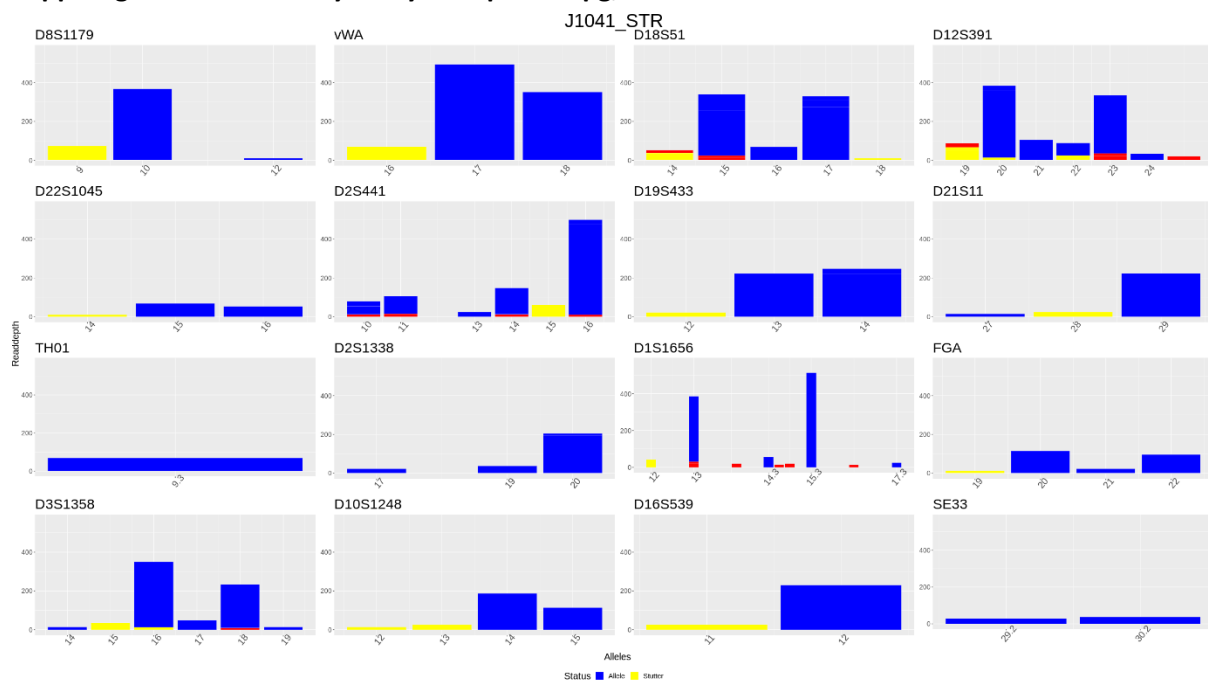

Suppl. Figure S5. Sensitivity study: Sample 62.5 pg, human DNA A5

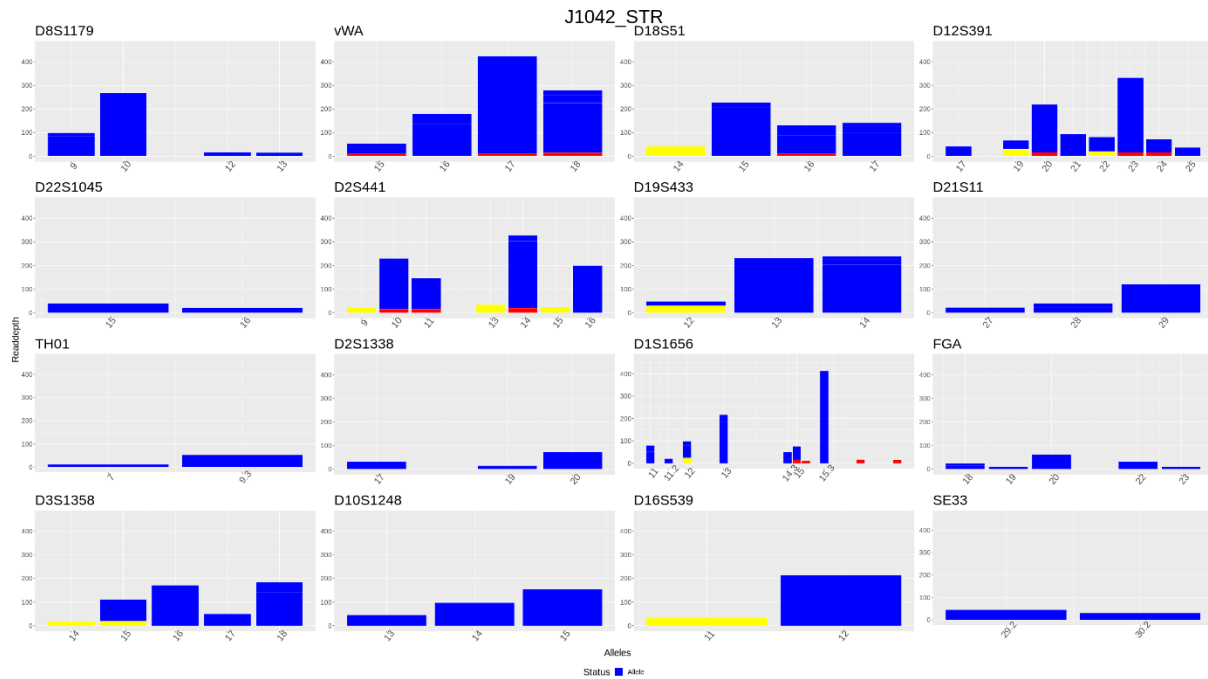

Suppl. Figure S6. Sensitivity study: Sample 31.25 pg, human DNA A5

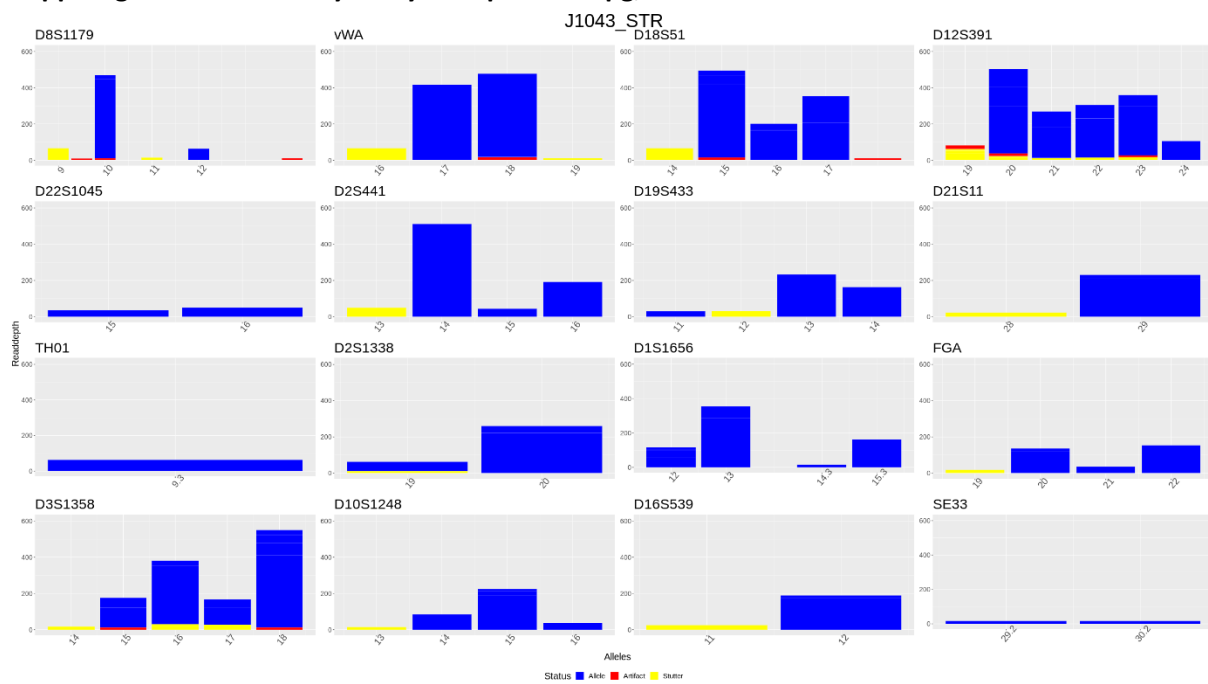

## Suppl. Figures S7-S11: Degradation study

### Suppl. Figure S7. Degradation study: Sample 0 mU/μL DNaseI, Hela DNA

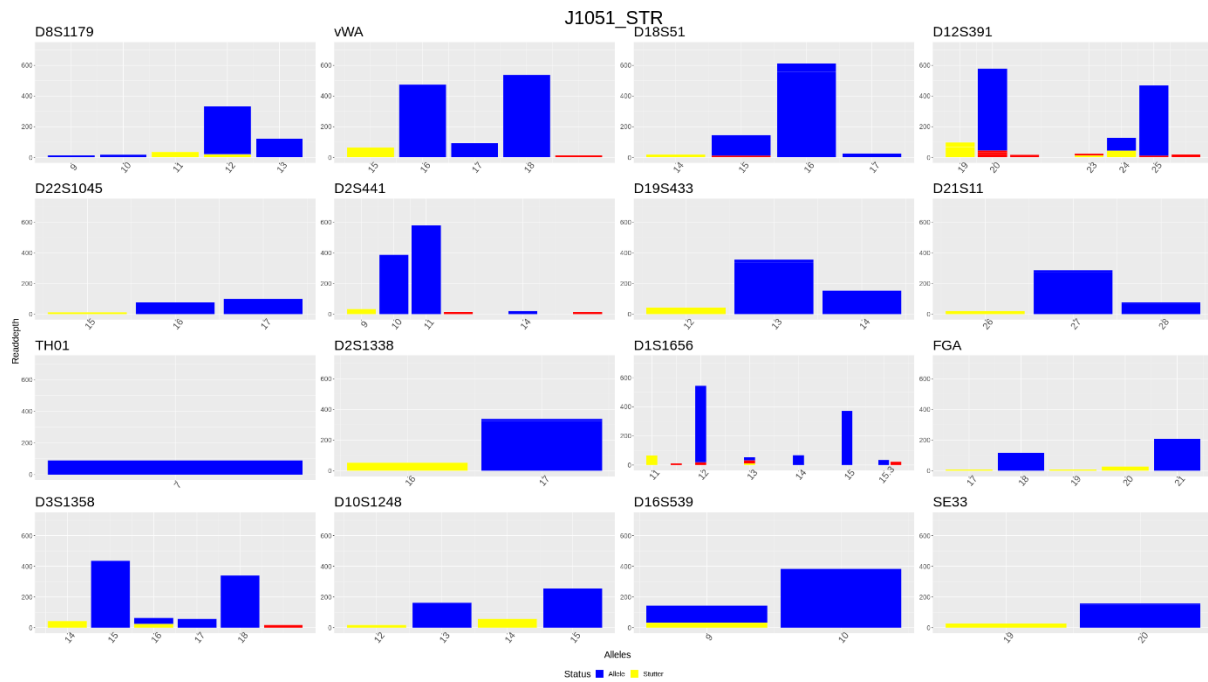

### Suppl. Figure S8. Degradation study: Sample 0.3 mU/μL DNaseI, Hela DNA

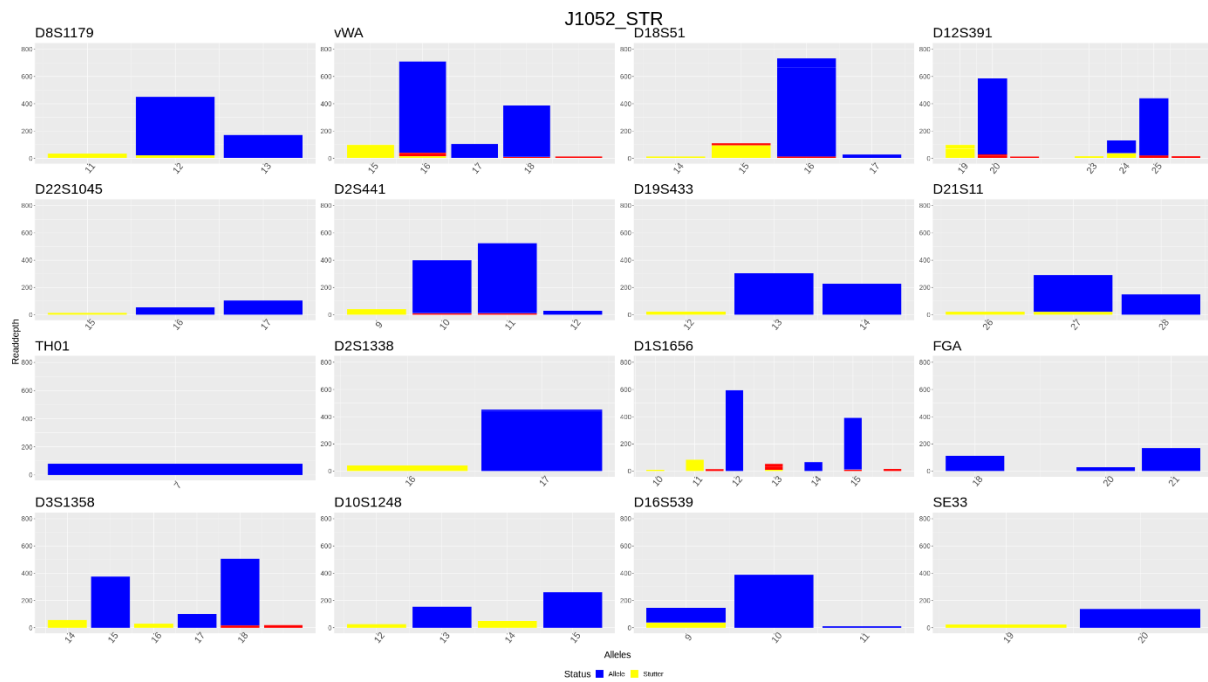

**Suppl. Figure S9. Degradation study: Sample 0.6 mU/μL DNaseI, Hela DNA**

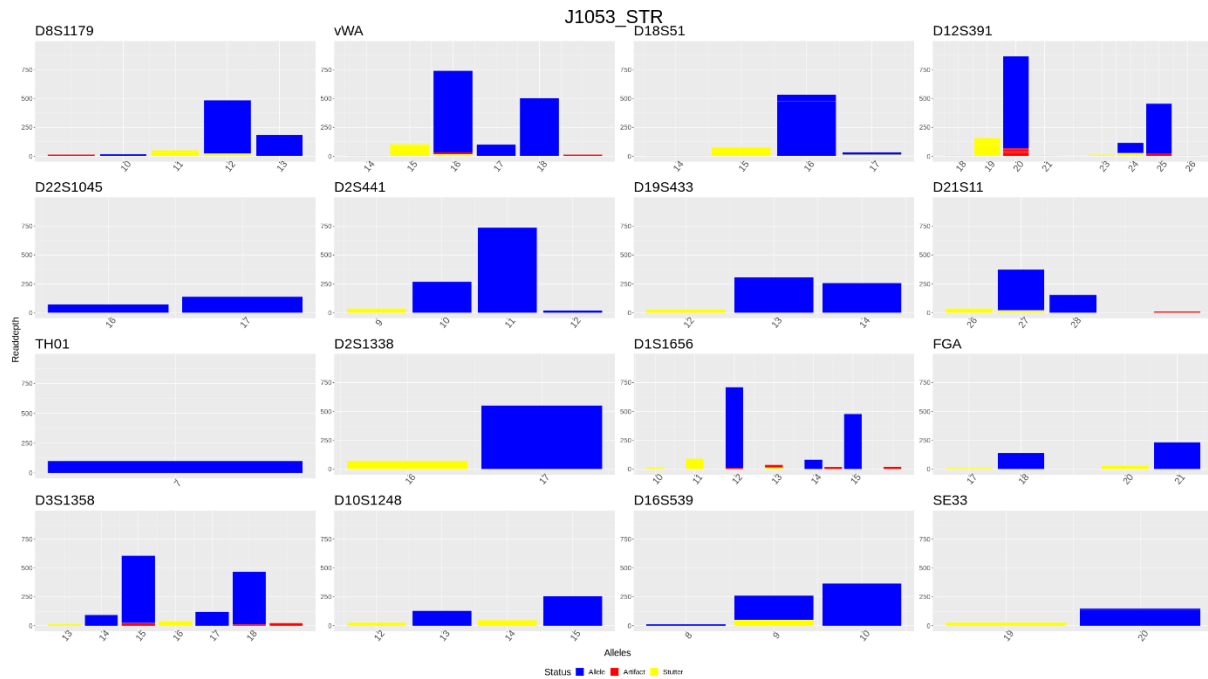

**Suppl. Figure S10. Degradation study: Sample 1.19 mU/μL DNaseI, Hela DNA**

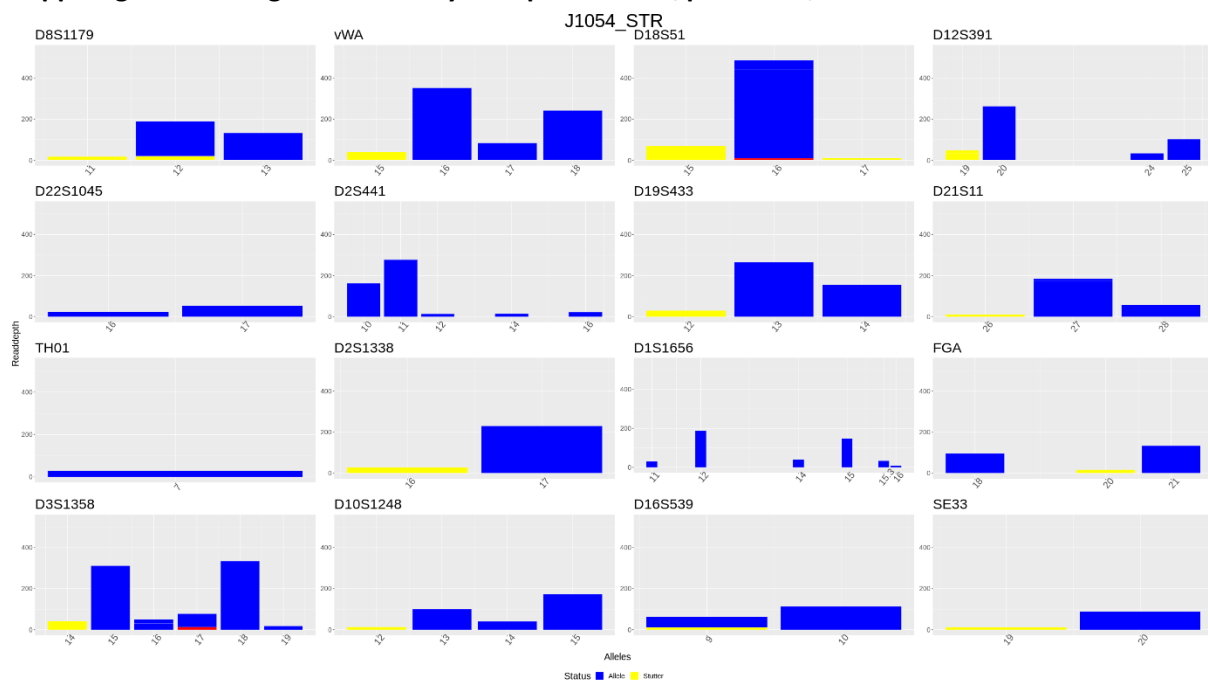



## Suppl. Figure S11. Degradation study: Sample 2.38 mU/μL DNaseI, Hela DNA

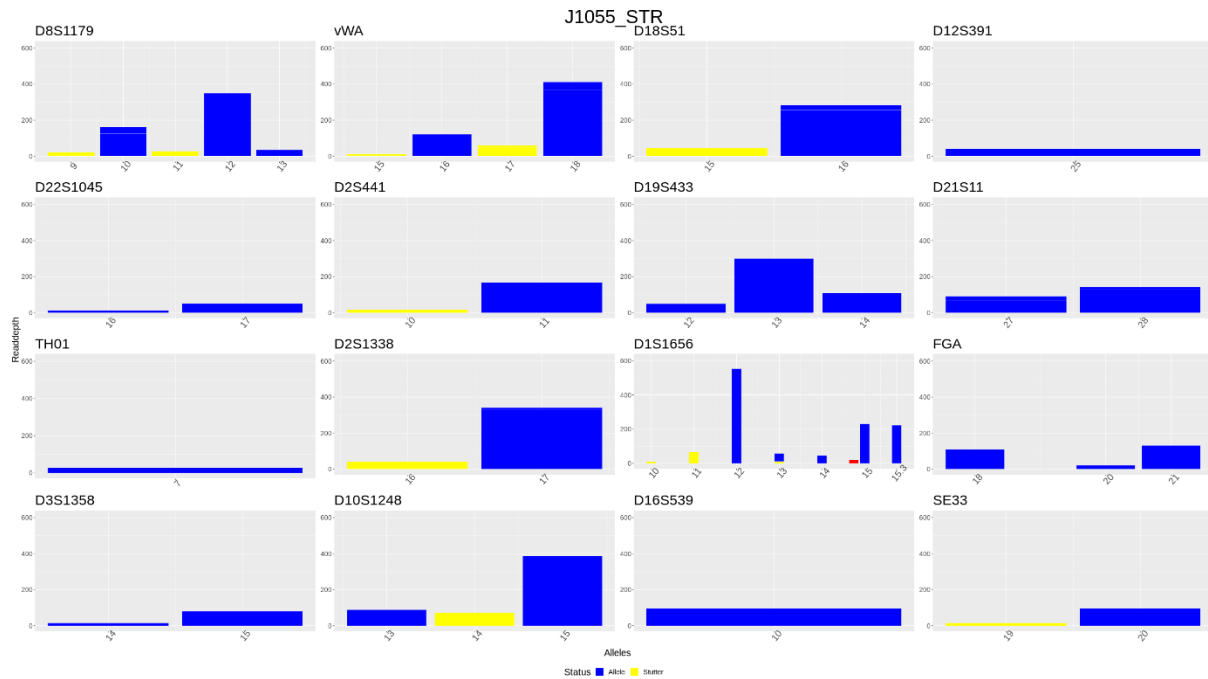

## Suppl. Figures S12-S17: Mixture study

### Suppl. Figure S12. Mixtures study: Sample 500 pg DNA, human DNA B5

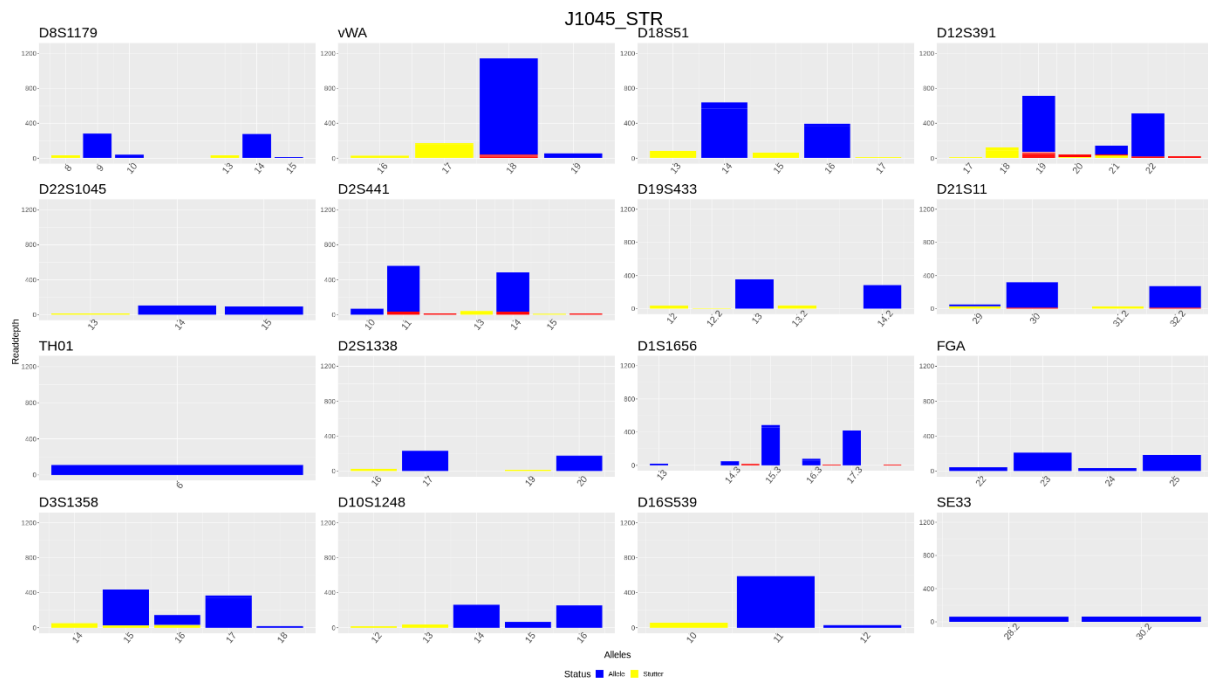

**Suppl. Figure S13. Mixtures study: Sample 50:50 mixture, human DNA A5 and B5**

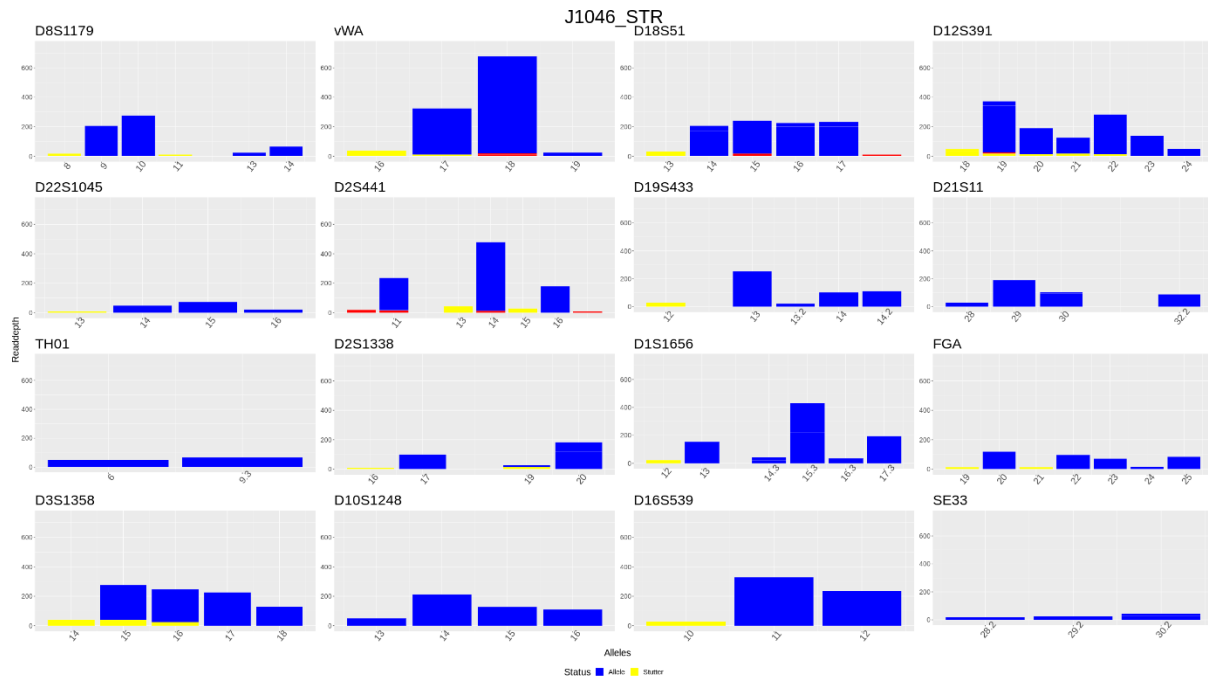

**Suppl. Figure S14. Mixtures study: Sample 75:25 mixture, human DNA A5 and B5**

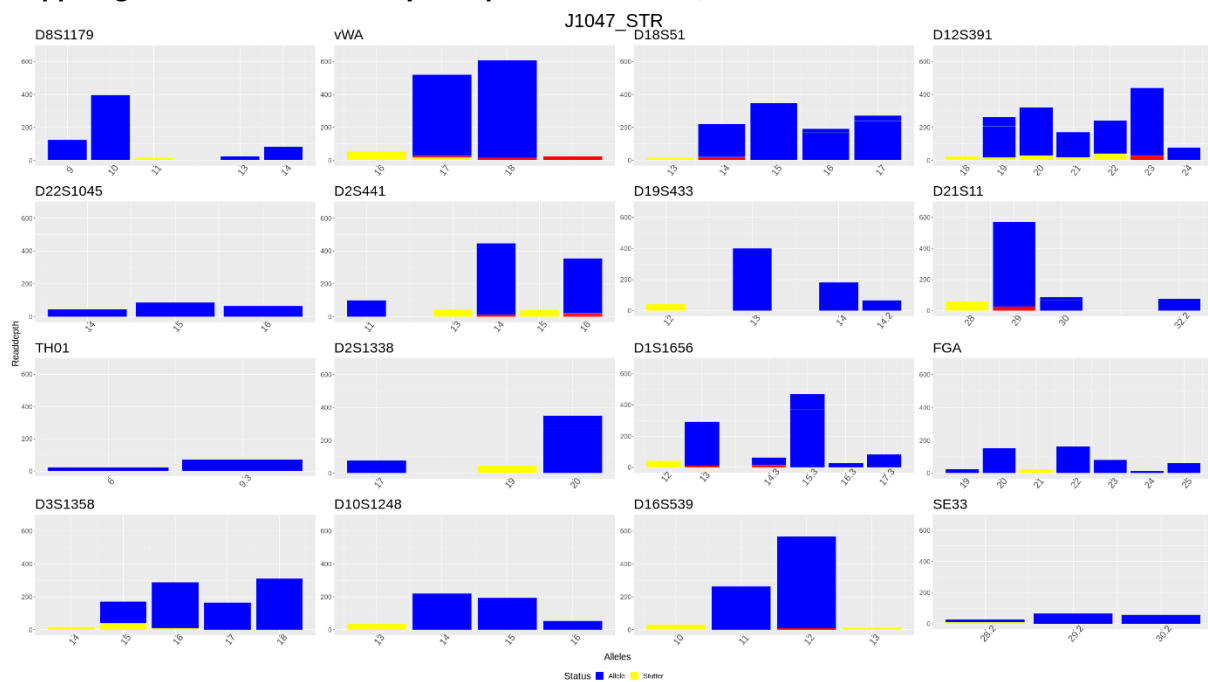

**Suppl. Figure S15. Mixtures study: Sample 90:10 mixture, human DNA A5 and B5**

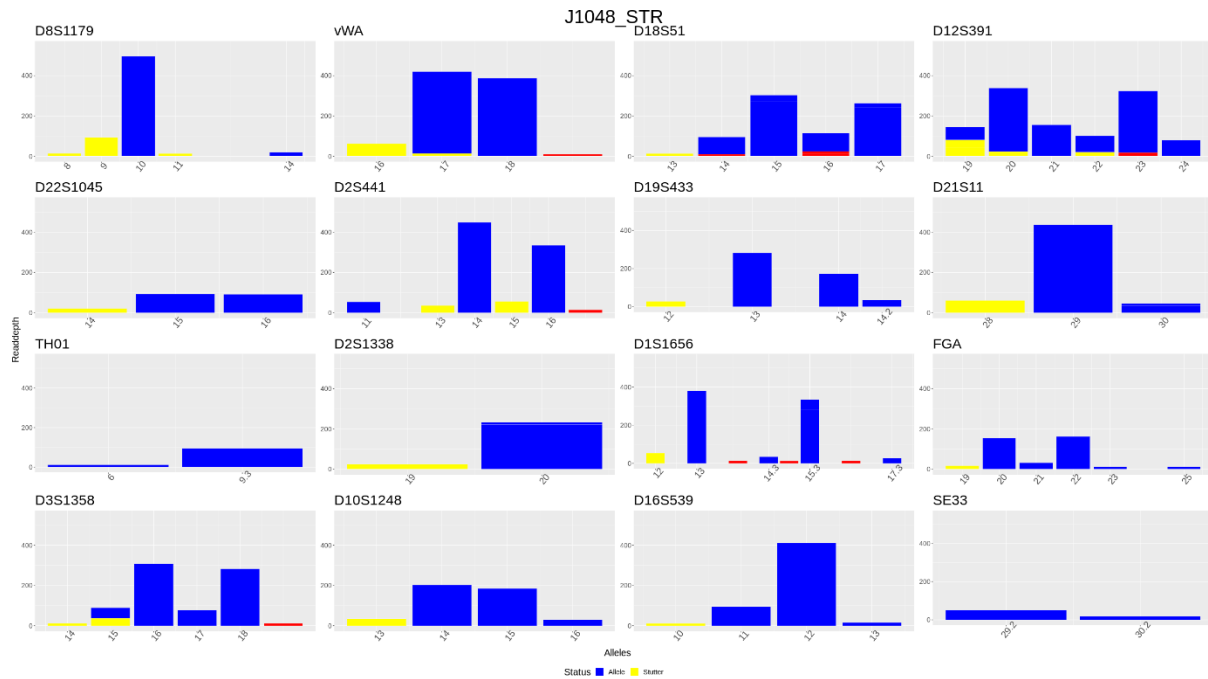

**Suppl. Figure S16. Mixtures study: Sample 95:5 mixture, human DNA A5 and B5**

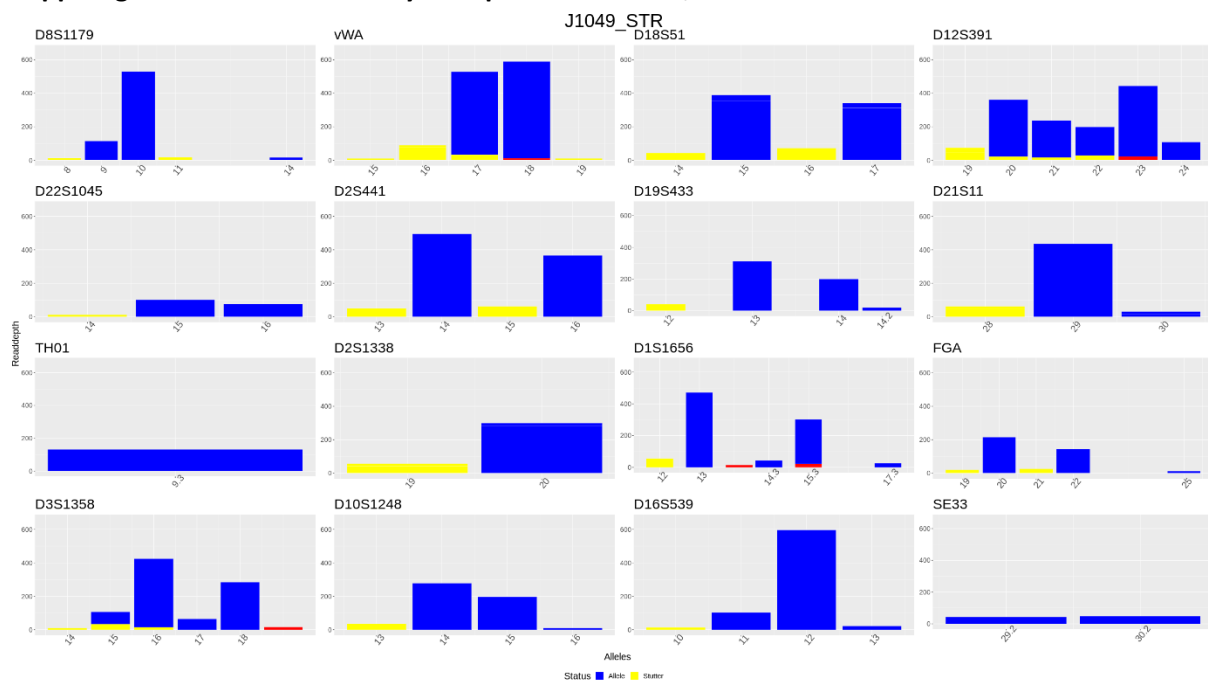

## Suppl. Figure S17. Mixtures study: Sample 98:2 mixture, human DNA A5 and B5

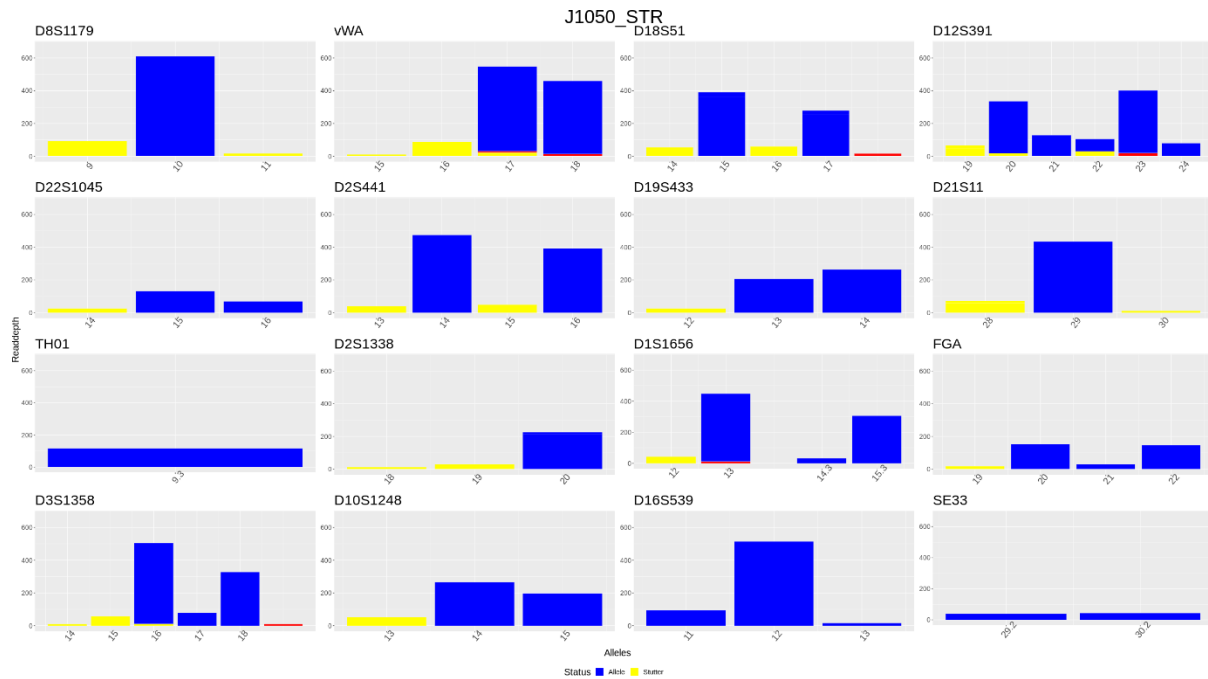

## Suppl. Figures S18-S35: Inhibitor study

### Suppl. Figure S18. Inhibitor study, 30 $\mu$ M hematin, human DNA A5

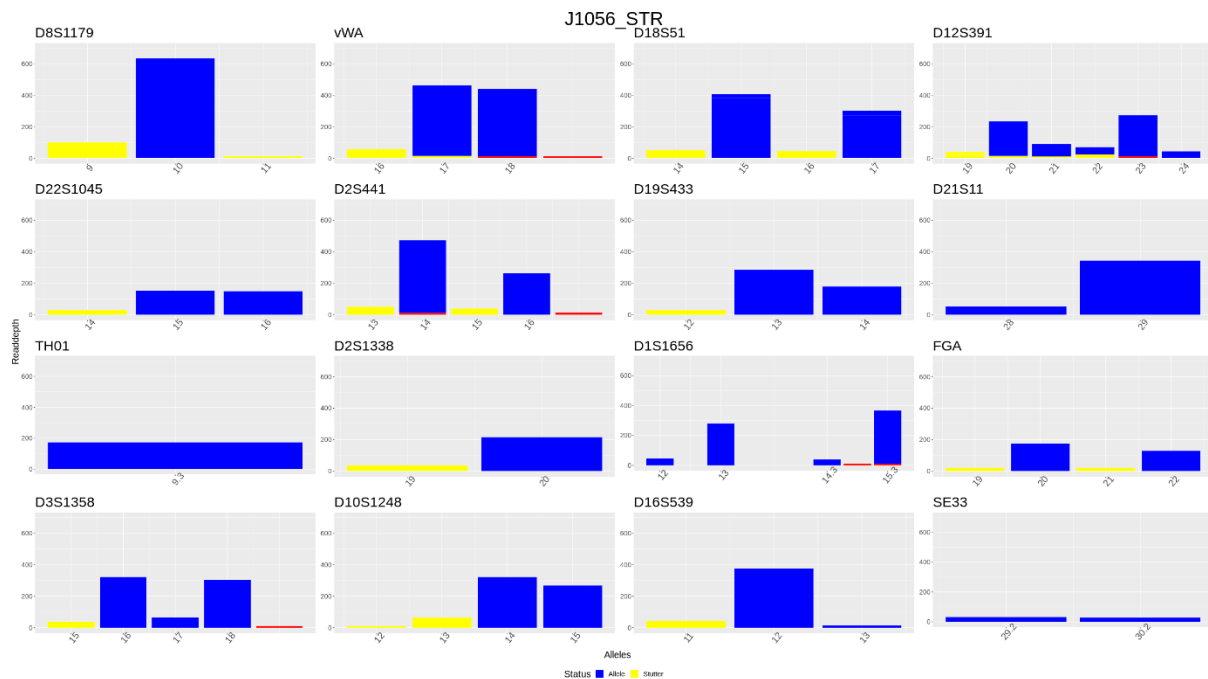

**Suppl. Figure S19. Inhibitor study, 60  $\mu$ M hematin, human DNA A5**

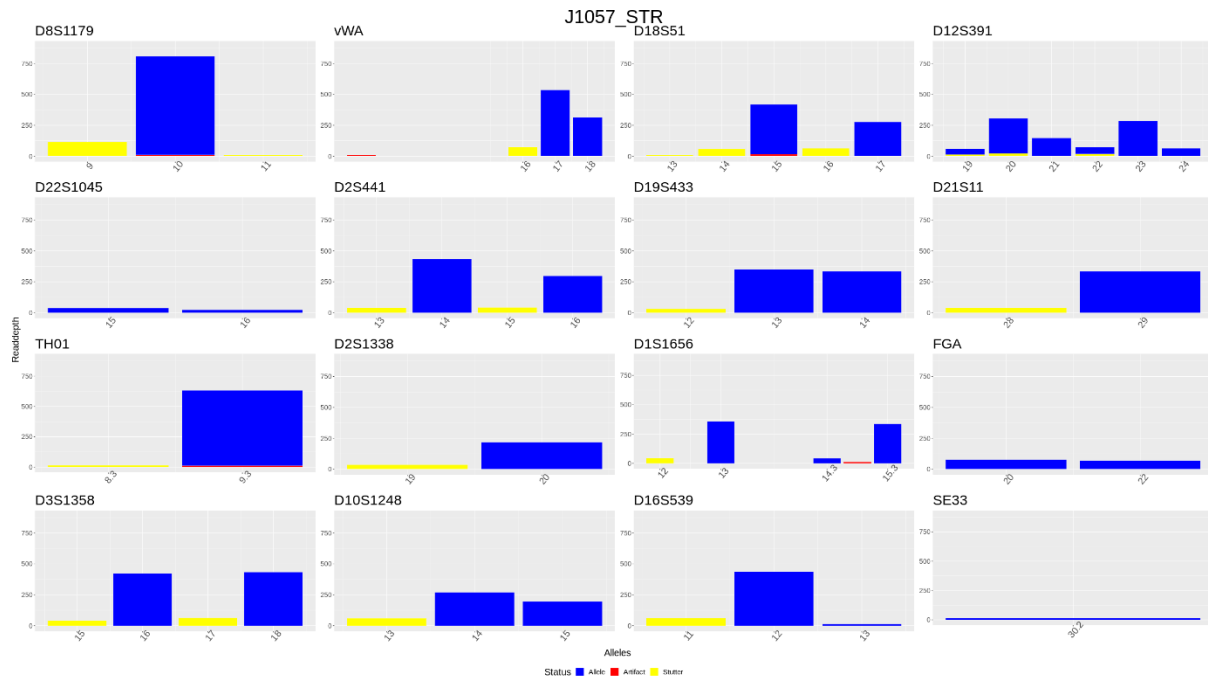

**Suppl. Figure S20. Inhibitor study, 120  $\mu$ M hematin, human DNA A5**

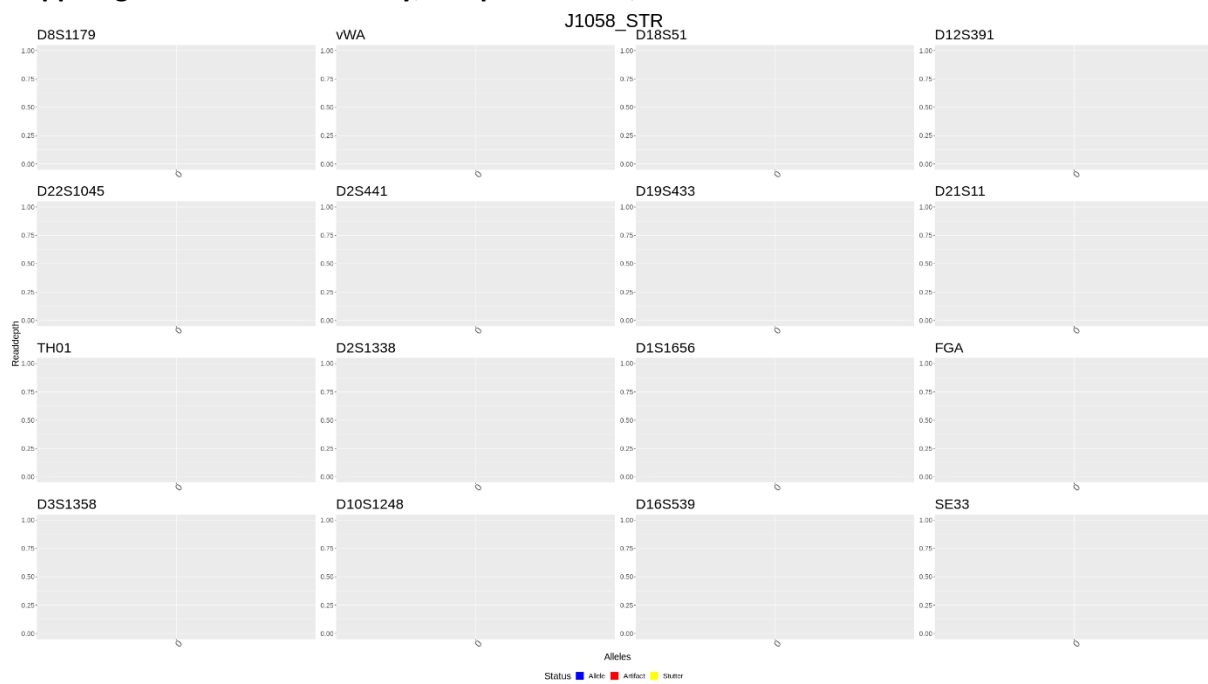

**Suppl. Figure S21. Inhibitor study, 120  $\mu$ M hematin with PowerPlex MM, human DNA A5**

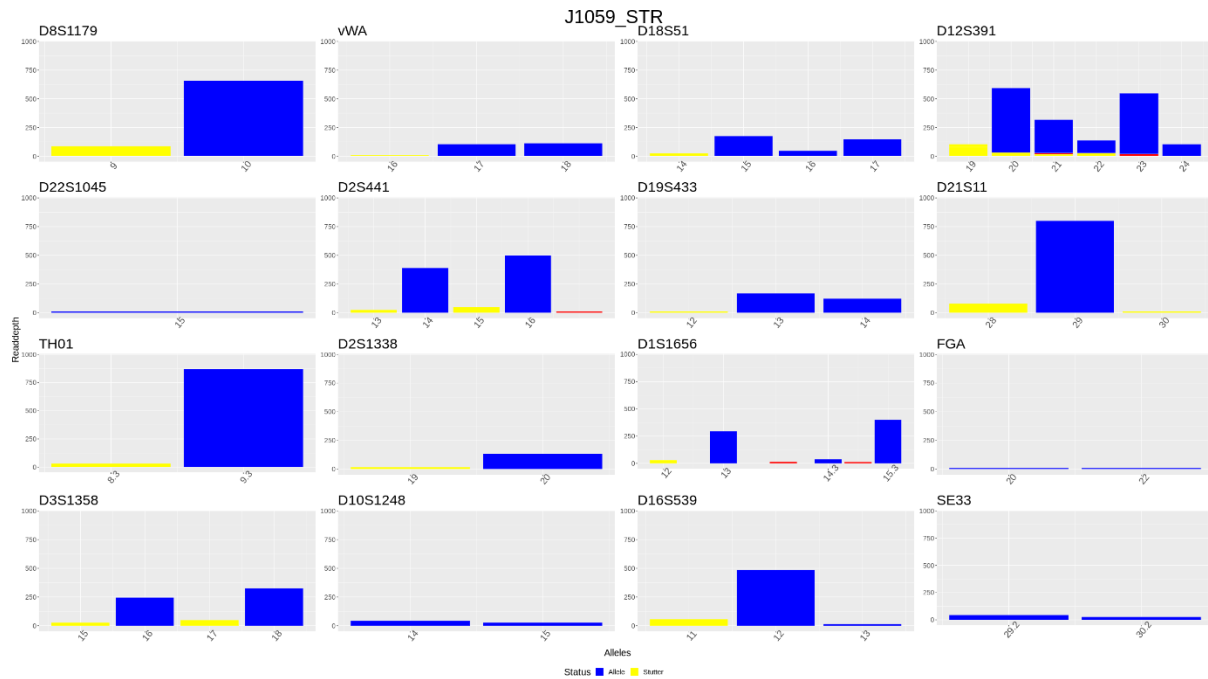

**Suppl. Figure S22. Inhibitor study, 120  $\mu$ M hematin with BSA, human DNA A5**

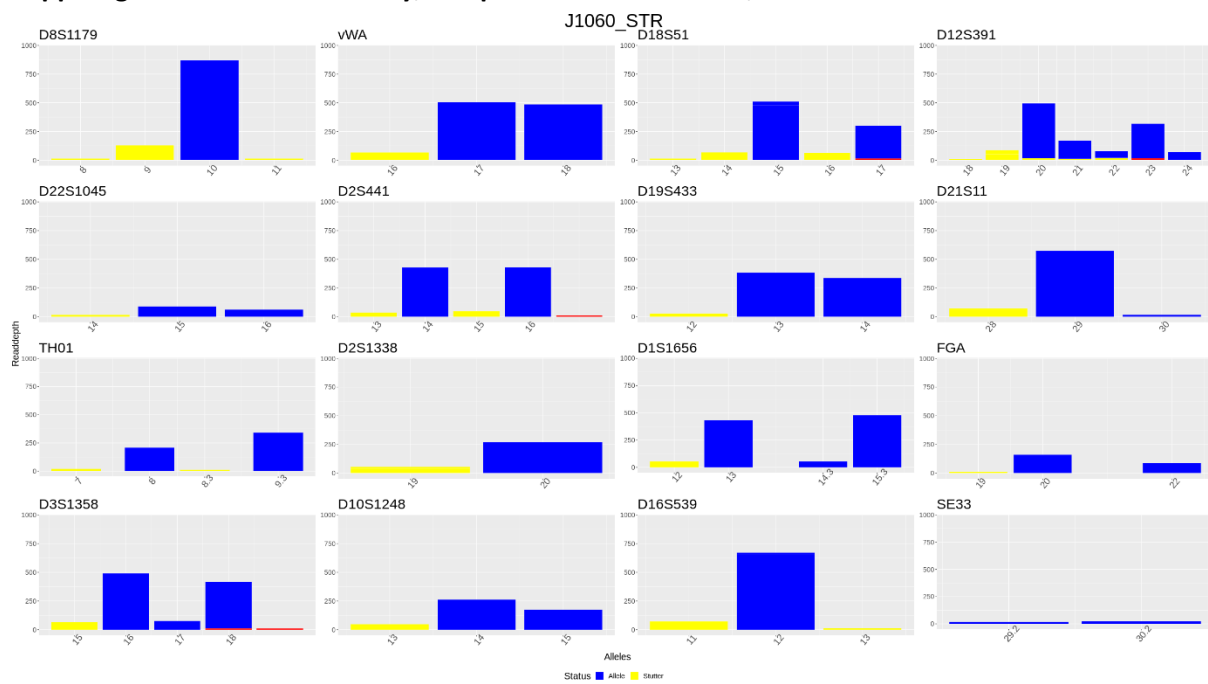

**Suppl. Figure S23. Inhibitor study, 50  $\mu$ M humic acid, human DNA A5**

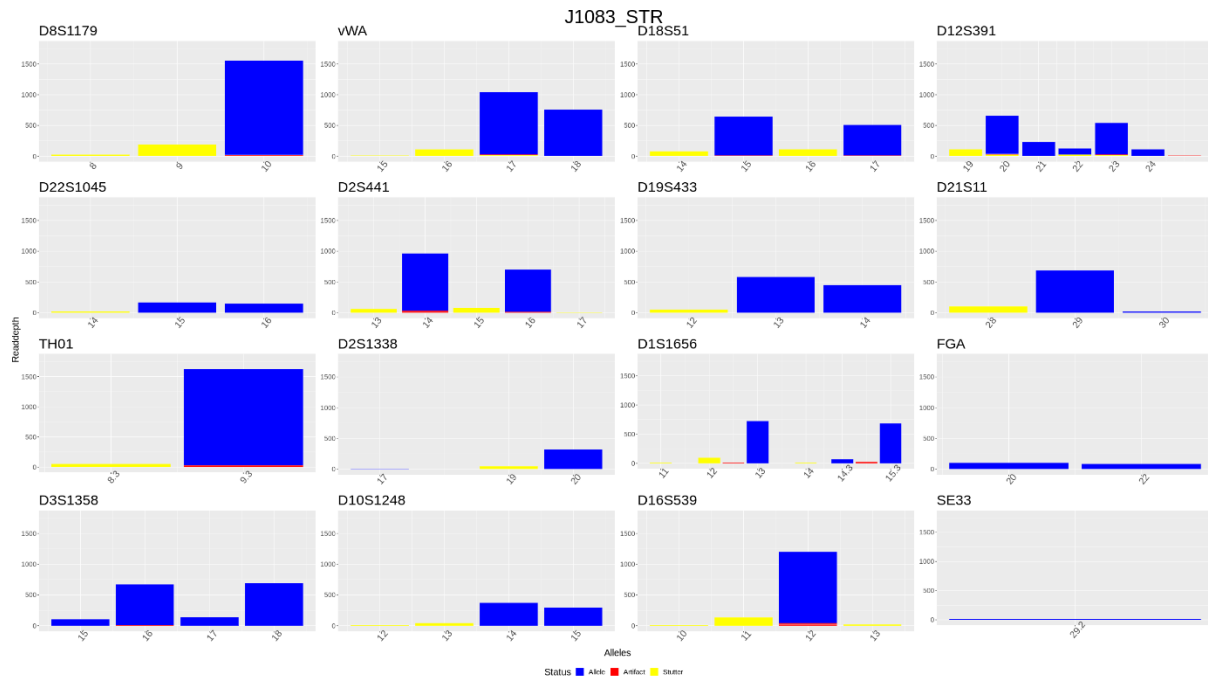

**Suppl. Figure S24. Inhibitor study, 100  $\mu$ M humic acid, human DNA A5**

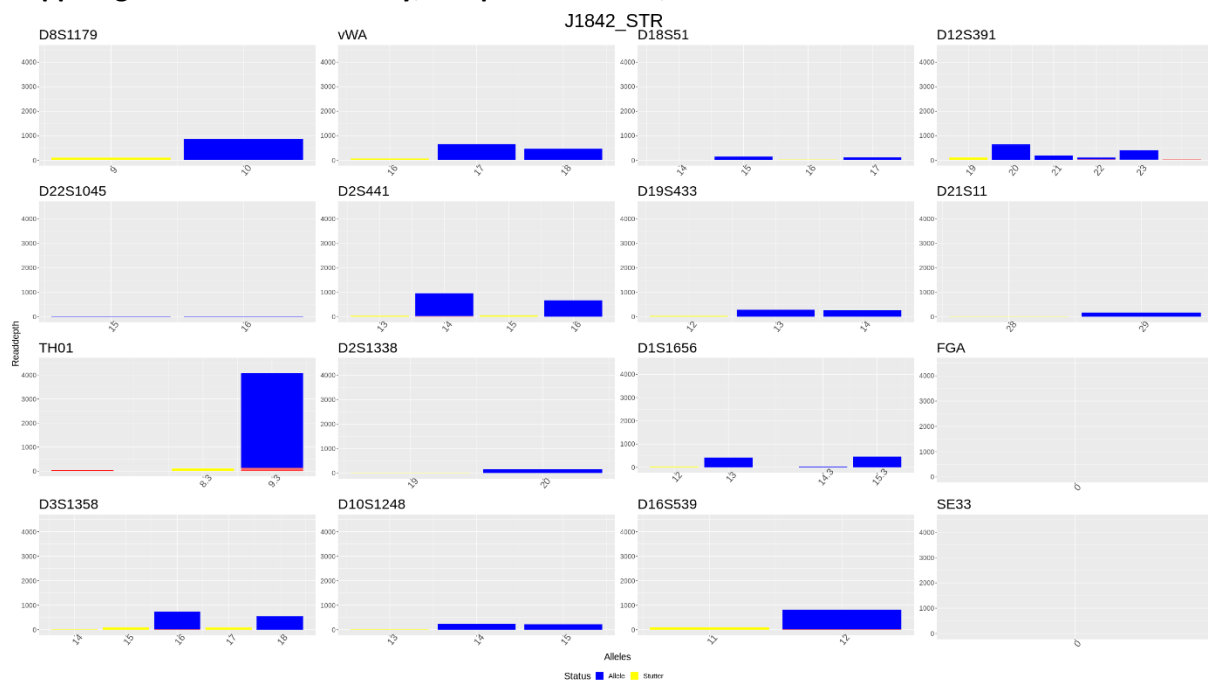

**Suppl. Figure S25. Inhibitor study, 200  $\mu$ M humic acid, human DNA A5**

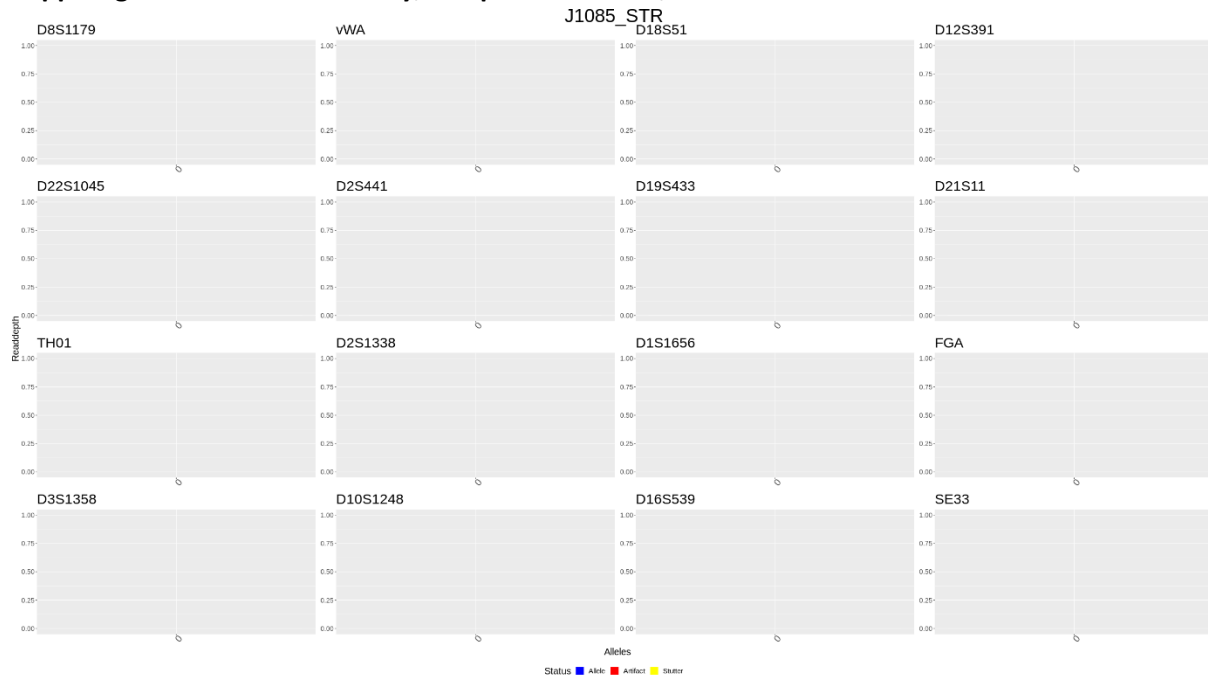

**Suppl. Figure S26. Inhibitor study, 200  $\mu$ M humic acid with PowerPlex MM, human DNA A5**

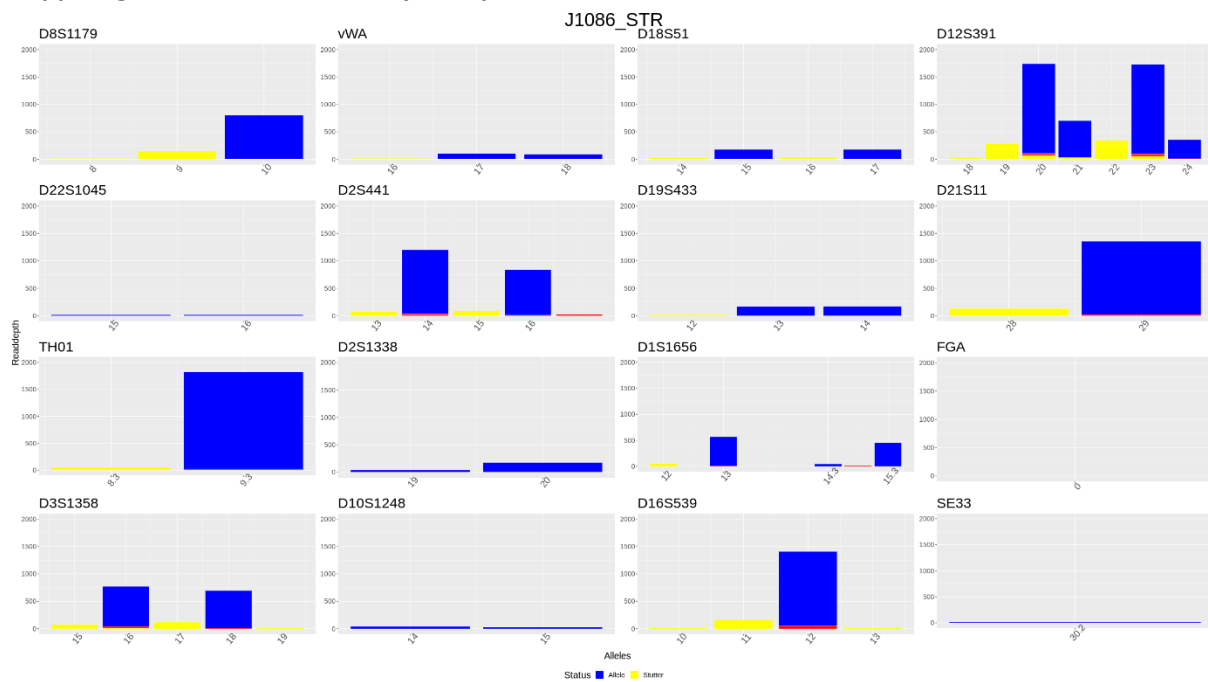



**Suppl. Figure S27. Inhibitor study, 200  $\mu$ M humic acid with BSA, human DNA A5**

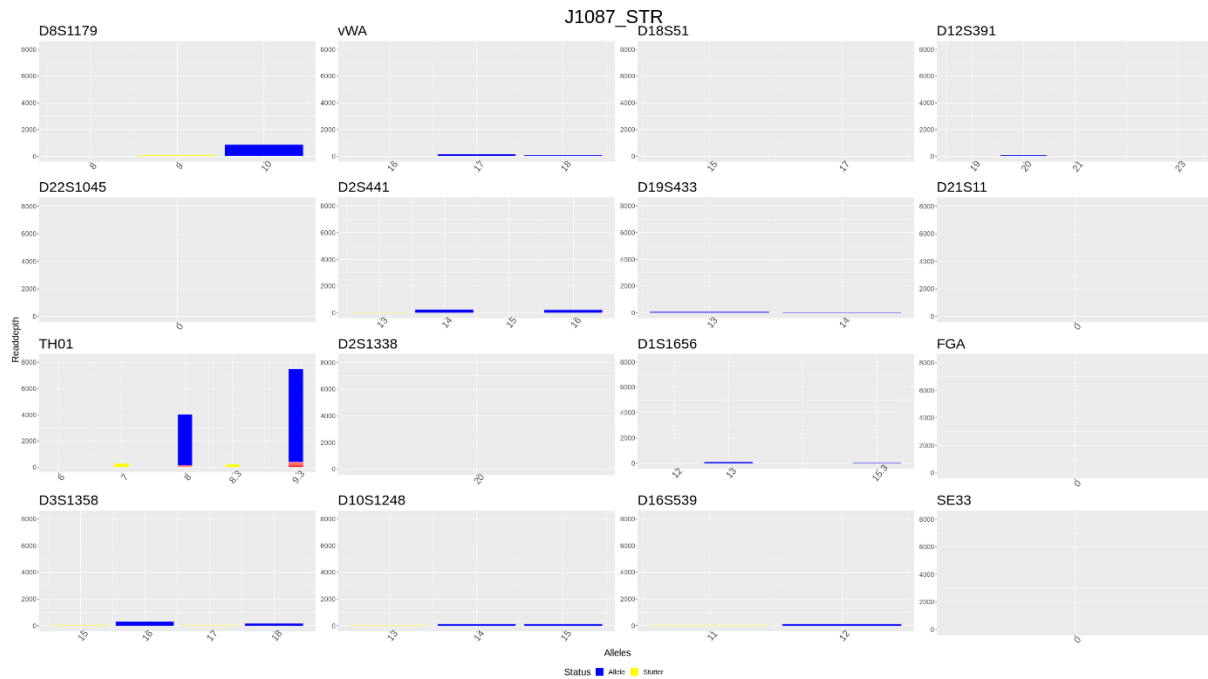

**Suppl. Figure S28. Inhibitor study, 25 $\mu$ M melanin, human DNA A5**

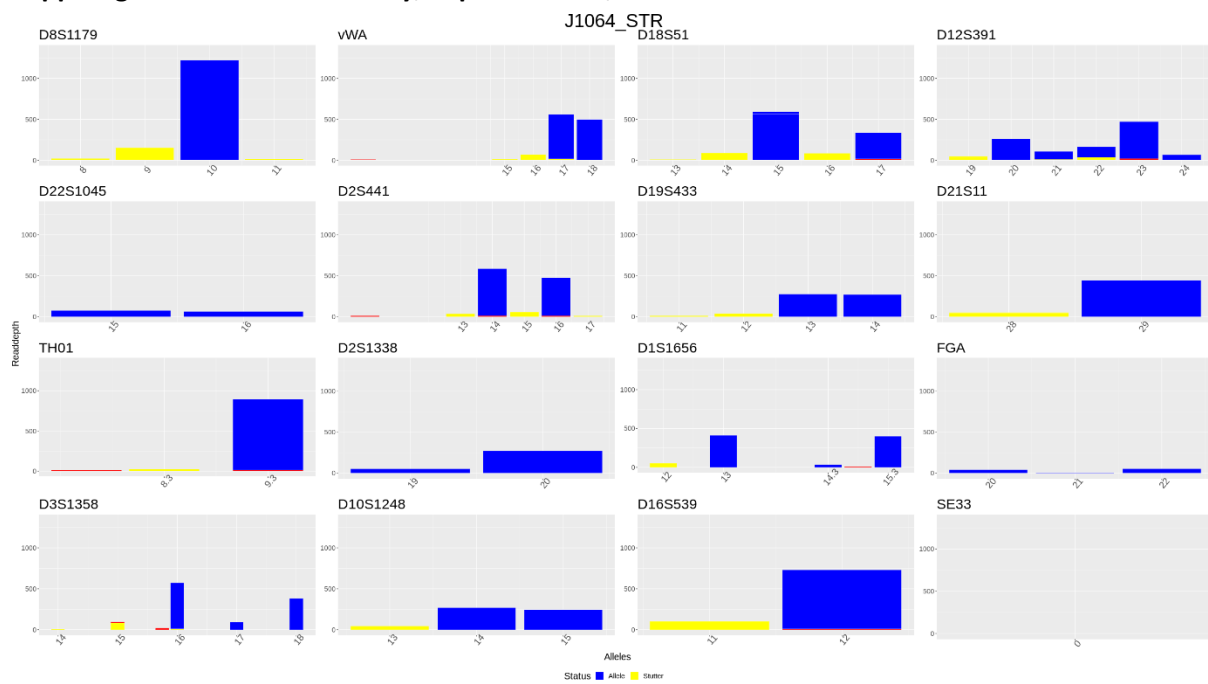

**Suppl. Figure S29. Inhibitor study, 50  $\mu$ M melanin, human DNA A5**

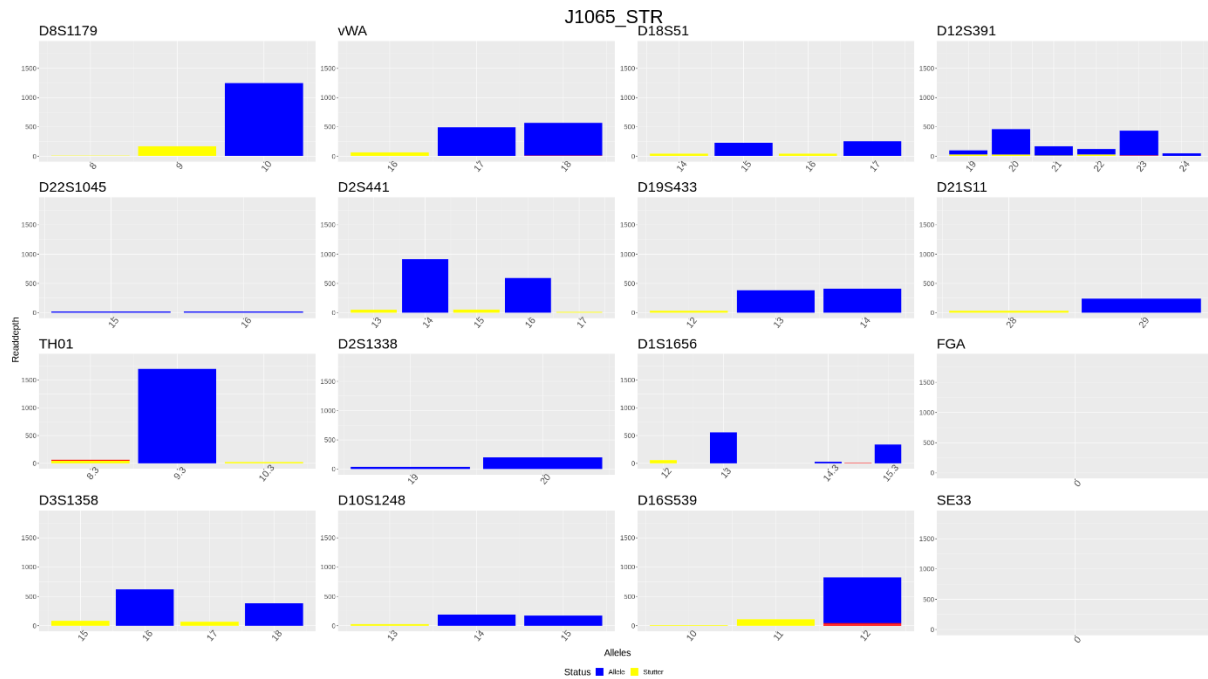

**Suppl. Figure S30. Inhibitor study, Sample 100  $\mu$ M melanin, human DNA A5**

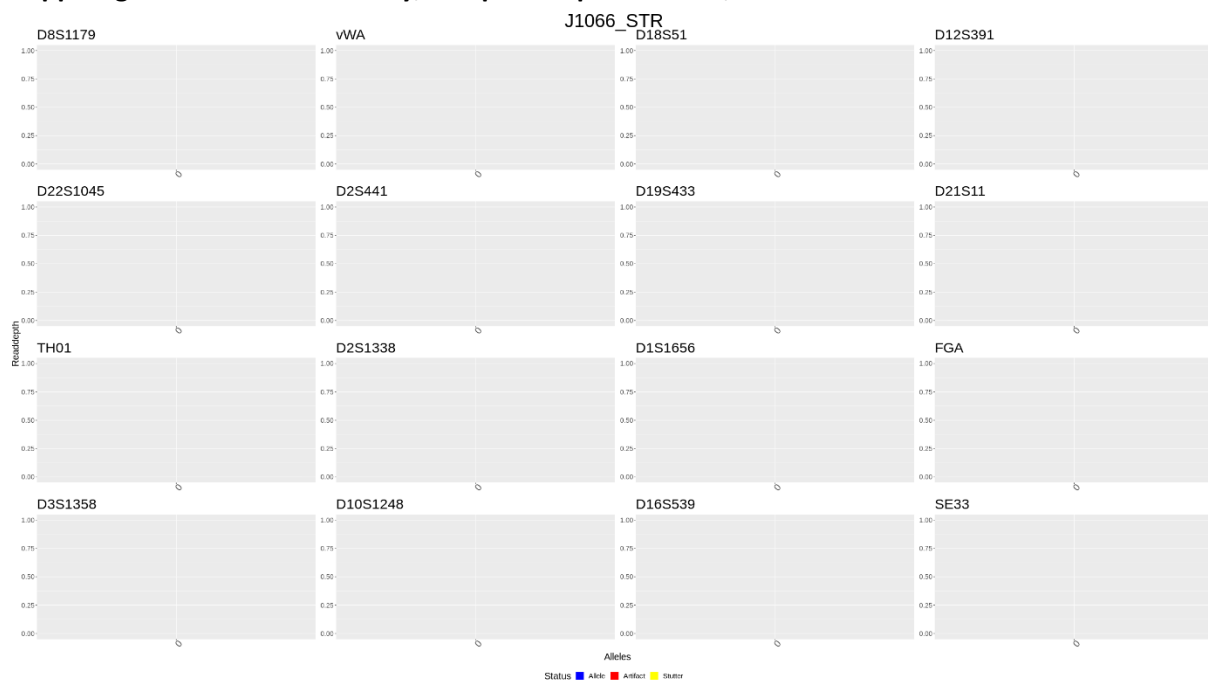

Figure 1 displays 15 allele frequency plots for various STR loci. Each plot shows ReadDepth (Y-axis, 0 to 1500) versus Alleles (X-axis, 0 to 26). The plots are arranged in a 4x4 grid, with the last cell empty. The loci are: D8S1179, D22S1045, TH01, D3S1358, vWA, D2S441, D2S1338, D10S1248, J1068\_STR, D18S51, D19S433, D1S1656, D16S539, D12S391, D21S11, FGA, and SE33. The plots show the distribution of alleles for two status groups: 'Allic' (blue bars) and 'Stutter' (yellow bars). The 'Allic' status shows a single peak for each locus, while the 'Stutter' status shows multiple peaks at lower depths.

**Suppl. Figure S33. Inhibitor study, 200  $\mu$ M indigo, human DNA A5**

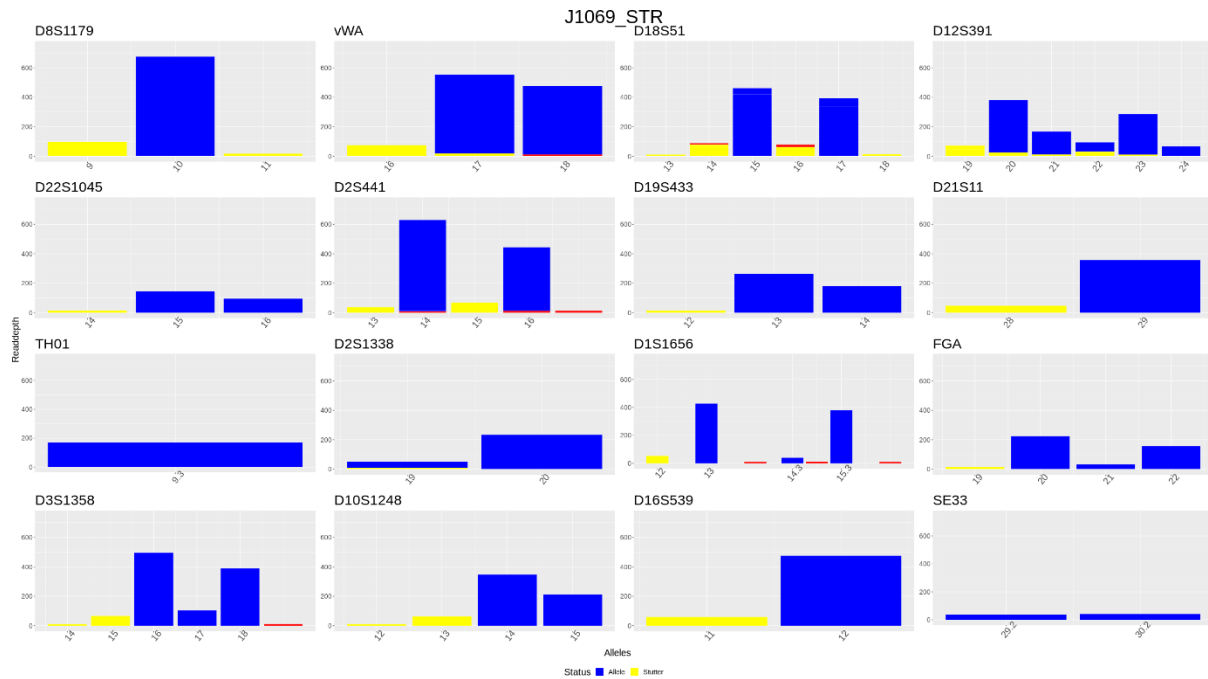

**Suppl. Figure S34. Inhibitor study, 400  $\mu$ M indigo, human DNA A5**

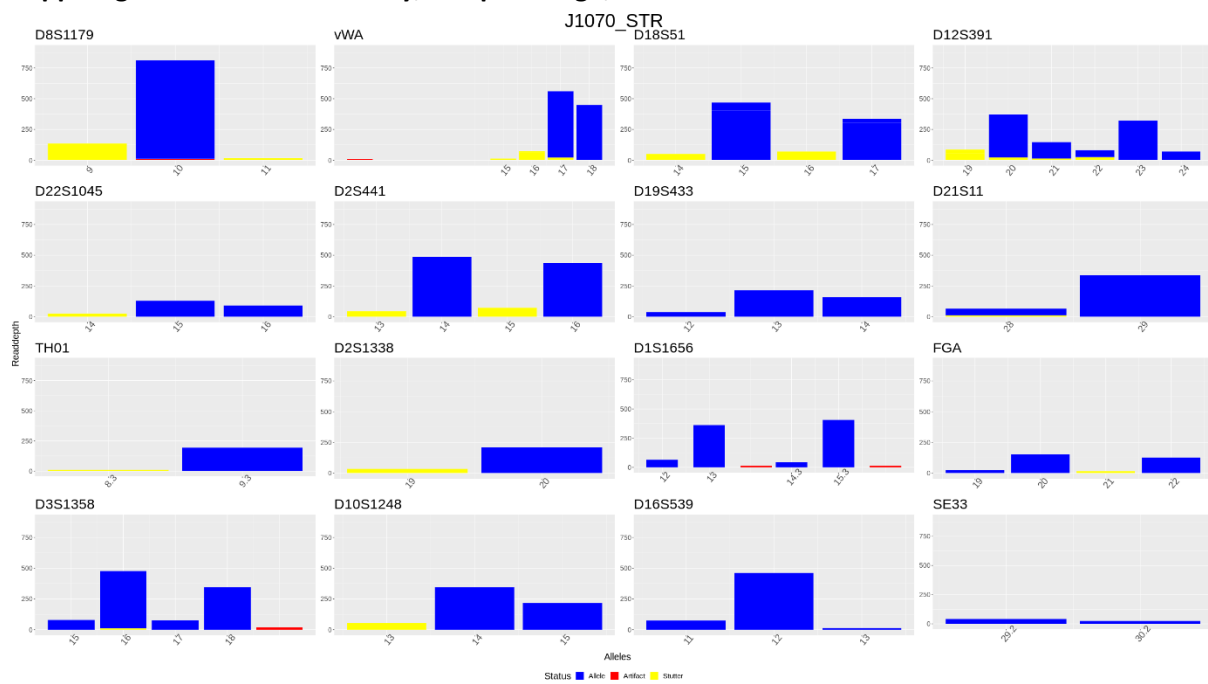

**Suppl. Figure S35. Inhibitor study, 800  $\mu$ M indigo, human DNA A5**

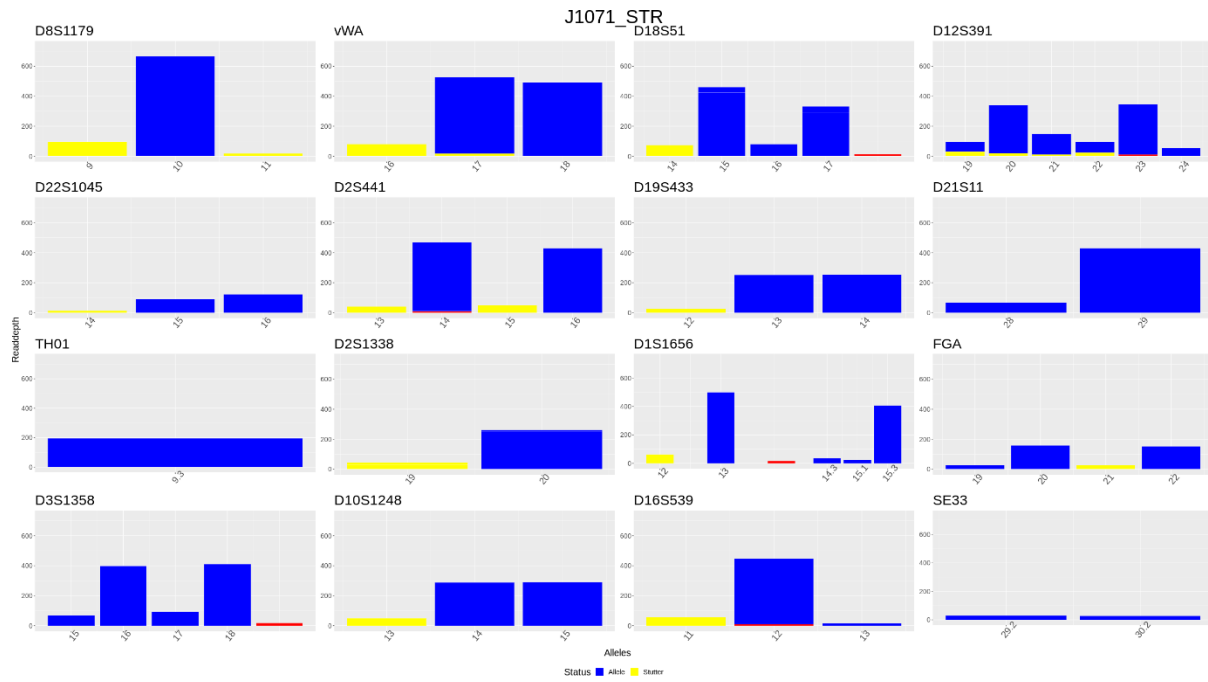

## Suppl. Figures S36-S38: Electropherograms of DNA A5, B5, and HeLa DNA

Suppl. Figure S36. Electropherogram of DNA A5 (500 pg, analysed with PowerPlex ESX17)

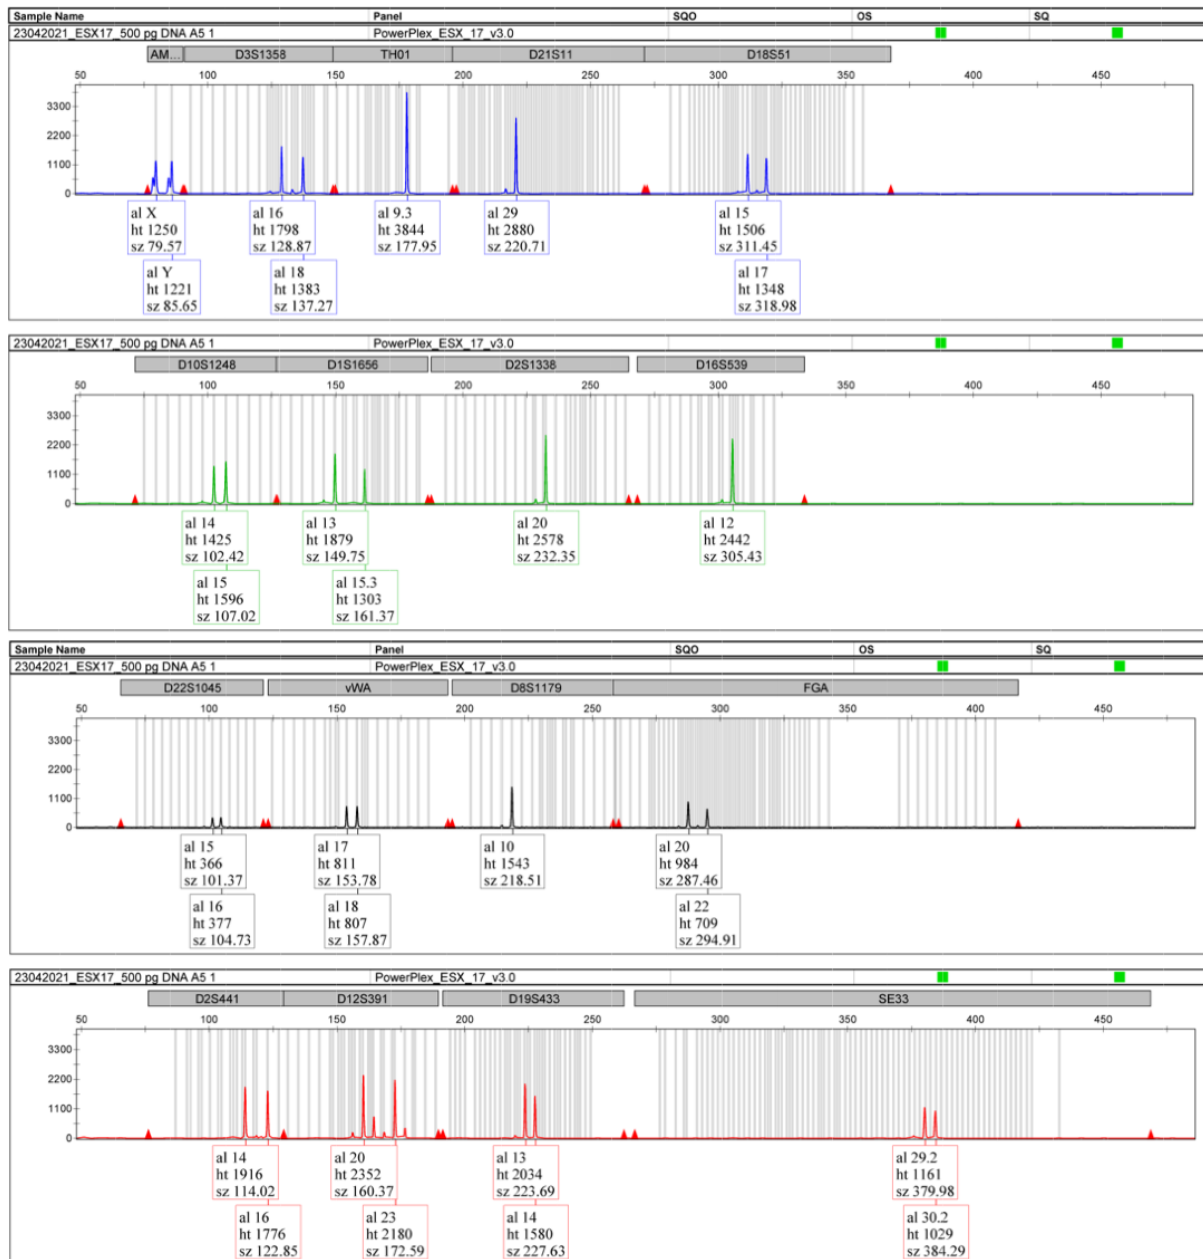

Suppl. Figure S37. Electropherogram of DNA B5 (500 pg, analysed with PowerPlex ESX17)

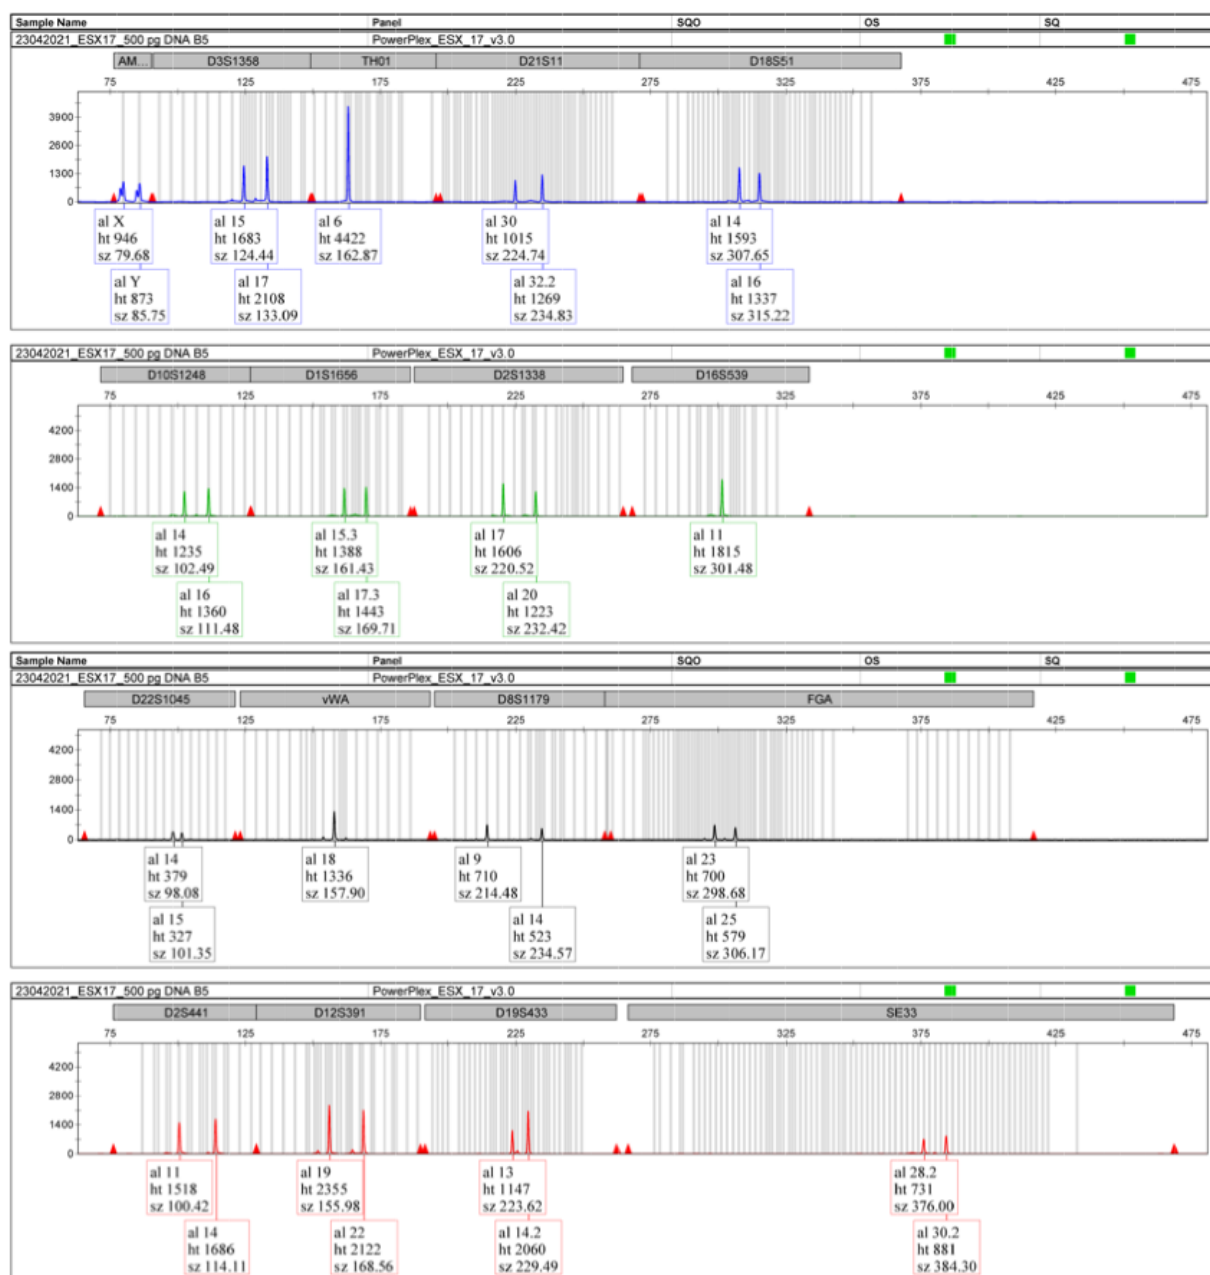

Suppl. Figure S38. Electropherogram of HeLa DNA (500 pg, analysed with PowerPlex ESX17)

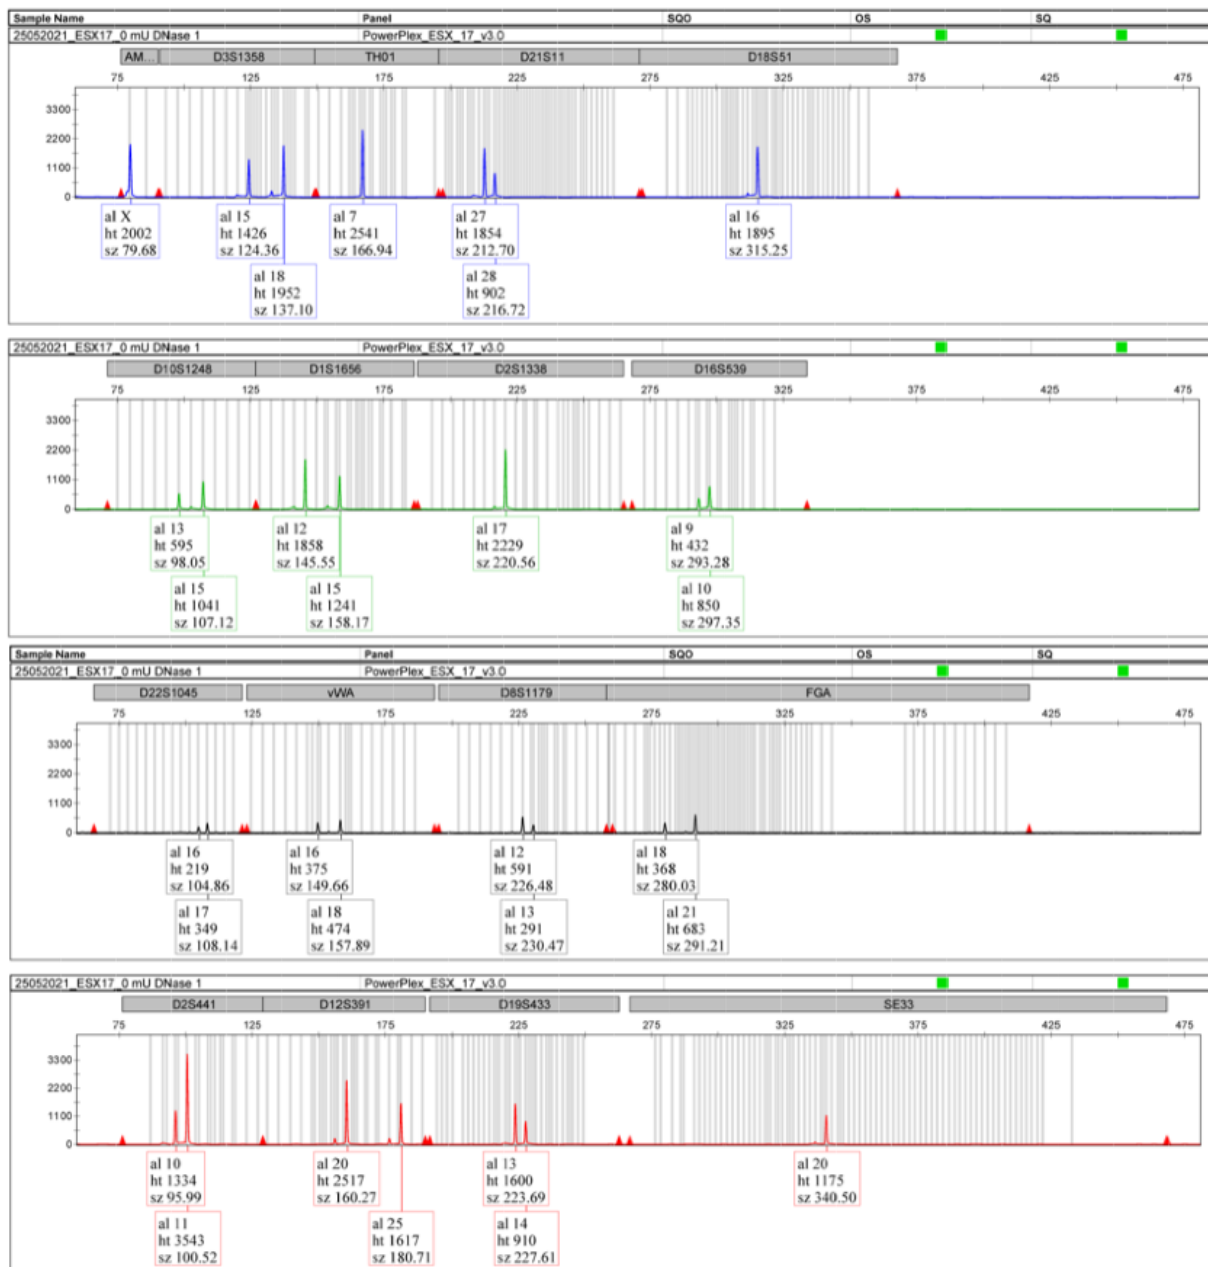



**Suppl. Figure S39: Intra- and inter-locus balances of profiles obtained with maSTR assay or CE analysis of PCR inhibitor-supplemented DNA samples**

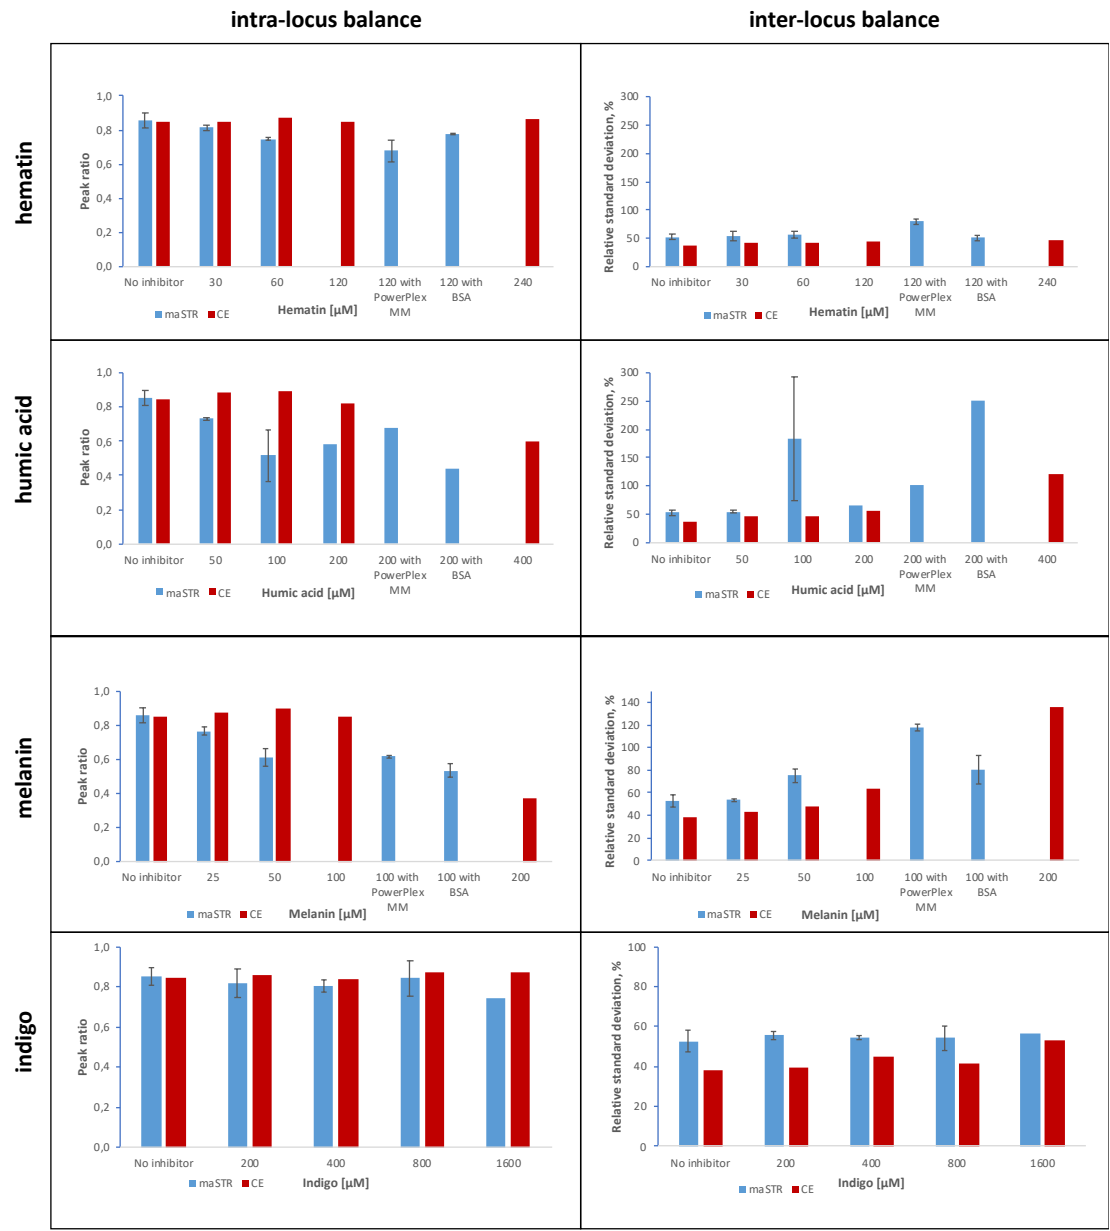

**Suppl. Figure S40: Intra-locus balance of HeLa DNA obtained with maSTR assay or CE analysis**

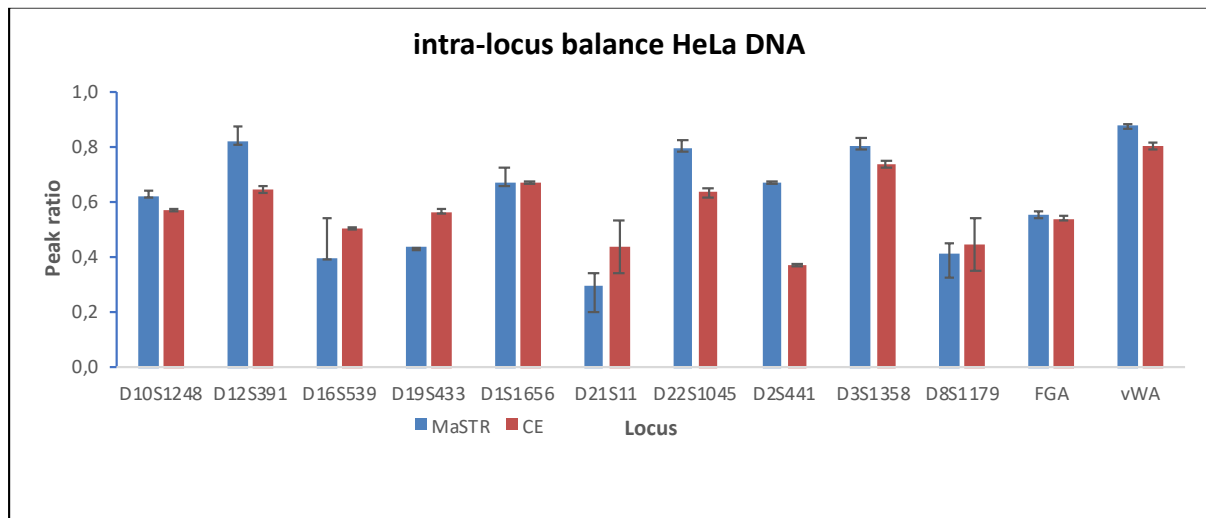

**Supplementary Table S2. Calculation of sequencing costs**

| Library preparation costs                      |                                     |                                                                     |                                                       |                                                       |                                                 |
|------------------------------------------------|-------------------------------------|---------------------------------------------------------------------|-------------------------------------------------------|-------------------------------------------------------|-------------------------------------------------|
| Kits                                           | Cost of the kit [€]                 | Number of samples that can be processed with this amount of reagent | Cost per sample [€]                                   |                                                       |                                                 |
| <b>maSTR</b>                                   |                                     |                                                                     |                                                       |                                                       |                                                 |
| QIAGEN Multiplex PCR <i>Plus</i> Kit           | 258                                 | 200                                                                 | 1,29                                                  |                                                       |                                                 |
| AMPure XP Reagent, 60 mL                       | 960,10                              | 789                                                                 | 1,22                                                  |                                                       |                                                 |
| KapaHiFi HotStart ReadyMix*                    | 450                                 | 250                                                                 | 1,8                                                   |                                                       |                                                 |
| Index kit                                      | 266                                 | 96                                                                  | 2,77                                                  |                                                       |                                                 |
| Promega ONEdsDNA quantification kit            | 308                                 | 500                                                                 | 0,62                                                  |                                                       |                                                 |
| Primers (25 nmole)                             | 580                                 | 10.000                                                              | 0,06                                                  |                                                       |                                                 |
| <b>Total</b>                                   |                                     |                                                                     | <b>7,75</b>                                           |                                                       |                                                 |
| <b>Verogen</b>                                 |                                     |                                                                     |                                                       |                                                       |                                                 |
| ForenSeq DNA Signature Prep Kit                | 6586                                | 96                                                                  | <b>68,60</b>                                          |                                                       |                                                 |
| <b>Promega</b>                                 |                                     |                                                                     |                                                       |                                                       |                                                 |
| Promega PowerSeq® 46GY                         | 5247                                | 100                                                                 | <b>52,47</b>                                          |                                                       |                                                 |
| Sequencing costs                               |                                     |                                                                     |                                                       |                                                       |                                                 |
| Workflow                                       | Sequencing Kits involved            | Cost of the kit [€]                                                 | Costs per sample, if to sequence 12 samples [€]       | Costs per sample, if to sequence 32 samples [€]       | Costs per sample, if to sequence 96 samples [€] |
| maSTR                                          | Miseq Reagent Nano Kit (500 cycles) | 394                                                                 | 32,83                                                 | 12,31                                                 | N/A                                             |
| Standard Verogen                               | Verogen MiSeq FGx Reagent Kit       | 1836                                                                | 153,00                                                | 57,38                                                 | 19,13                                           |
| Micro Verogen                                  | Verogen MiSeq FGx Reagent Micro Kit | 791                                                                 | 65,92                                                 | 24,72                                                 | N/A                                             |
| Promega PowerSeq                               | MiSeq Reagent Kit v3 (600 cycles)   | 1725                                                                | 143,75                                                | 53,90                                                 | 17,97                                           |
| Total costs (library preparation + sequencing) |                                     |                                                                     |                                                       |                                                       |                                                 |
| Workflow                                       | Sequencing Kits involved            | Total costs per sample, if to sequence 12 samples [€]               | Total costs per sample, if to sequence 32 samples [€] | Total costs per sample, if to sequence 96 samples [€] |                                                 |
| maSTR                                          | Miseq Reagent Nano Kit (500 cycles) | 40,59                                                               | 20,06                                                 | N/A                                                   |                                                 |
| Standard Verogen                               | Verogen MiSeq FGx Reagent Kit       | 221,60                                                              | 125,98                                                | 87,73                                                 |                                                 |
| Micro Verogen                                  | Verogen MiSeq FGx Reagent Micro Kit | 134,52                                                              | 93,32                                                 | N/A                                                   |                                                 |
| Promega PowerSeq                               | MiSeq Reagent Kit v3 (600 cycles)   | 196,22                                                              | 106,37                                                | 70,44                                                 |                                                 |
